# Supplementary material
Source: PubMed Central journal article supplement (PMC8727846)
Supplement: mmc1.pdf [file mmc1.pdf]

## Predicting Lymph Node Metastasis in Non-small Cell Lung Cancer

### Prospective External and Temporal Validation of the HAL and HOMER Models

*Gabriela Martinez-Zayas, MD; Francisco A. Almeida, MD; Lonny Yarmus, DO;  
Daniel Steinfort, PhD; Donald R. Lazarus, MD; Michael J. Simoff, MD;  
Timothy Saettele, MD; Septimiu Murgu, MD; Tarek Dammad, MD; D. Kevin Duong, DO;  
Lakshmi Mudambi, MD; Joshua J. Filner, MD; Sofia Molina, MD; Carlos Aravena, MD;  
Jeffrey Thiboutot, MD; Asha Bonney, MD; Adriana M. Rueda, MD; Labib G. Debiane, MD;  
D. Kyle Hogarth, MD; Harmeet Bedi, MD; Mark Deffebach, MD; Ala-Eddin S. Sagar, MD;  
Joseph Cicenía, MD; Diana H. Yu, MD; Avi Cohen, MD; Laura Frye, MD;  
Horiana B. Grosu, MD, MPH; Thomas Gildea, MD; David Feller-Kopman, MD;  
Roberto F. Casal, MD; Michael Machuzak, MD; Muhammad H. Arain, MBBS;  
Sonali Sethi, MD; George A. Eapen, MD; Louis Lam, MD; Carlos A. Jimenez, MD;  
Manuel Ribeiro, MD; Laila Z. Noor, MD; Atul Mehta, MD; Juhee Song, PhD;  
Humberto Choi, MD; Junsheng Ma, PhD; Liang Li, PhD; and David E. Ost, MD, MPH*

CHEST 2021; 160(3):1108-1120

*Online supplements are not copyedited prior to posting and the author(s) take full responsibility for the accuracy of all data.*

## **e-Appendix 1.**

### **Methods**

All centers enrolled consecutive patients with NSCLC with clinical radiographic stage T1-3, N0-3, M0 disease based on PET-CT. Patients that did not have a PET scan were excluded (e-Table 1). The study was approved by the Institutional Review Board, Committee 4, Protocol PA16-0107 at the University of Texas MD Anderson on June 10, 2016 and was closed to enrollment on March 1, 2019. A waiver of informed consent was obtained because this was purely observational and all tests were part of the standard of care. Each site also obtained IRB approval for their local site. Sites did not all start at the same time, because IRB approval speed varied significantly between centers. To be included in the study, we specified a priori the start and end dates did not matter, so long as for a given center consecutive patients were enrolled.

#### *Variable Definitions and Interaction Terms for HAL and HOMER*

As previously published in the HAL and HOMER reports, the variable definitions used for both the HAL and HOMER models were developed a priori and provided to all sites before data abstraction.<sup>1,2</sup> The variables were chosen based on prior clinical research published in the literature or experience in clinical practice that suggested a possible relationship between the variable and the probability of nodal involvement.

All radiographic variables were determined by reviewing the radiology report and further image review by an interventional pulmonologist (or a supervised interventional pulmonary fellow). For computed tomography (CT) scans, abnormal lymph nodes were those measuring  $\geq 1$  cm in their short axis. If both contrast and non-contrast CT were available, the contrast-enhanced images were used to determine CT N stage. Positive emission tomography (PET) N stage was based on the radiologist's interpretation of mediastinal lymph node fluorodeoxyglucose (FDG) activity. In cases when standardized uptake values (SUV) measurements were recorded, a value  $\geq 2.5$  was considered as positive. For both CT and PET N stage, the highest abnormal N stage lymph node was recorded.

We specified a priori that we would use positron emission tomography and computed tomography (PET-CT) N stage using interactions between CT N stage and PET N stage, based on previous work that suggested that sensitivity of PET for mediastinal lymph node involvement is conditional on the size of the node on CT.<sup>3</sup> Because PET-CT images do not use contrast, we pre-specified that we would combine N0 and N1 disease for CT N stage but would keep them separate when determining PET N stage.

The location of the tumor (central vs. peripheral) was defined based on the location of the center of the tumor. Tumors defined as central 1/3rd location tumors were those that by CT were located within the inner 1/3rd of the hemi-thorax (with the hilum being the center) or

if the tumor was within the segmental airways. Tumors located in the outer 2/3rds of the hemithorax required that the tumor did not touch the segmental airways and that the tumor center was located outside the central 1/3rd of the lung (Figure E1).<sup>4,5</sup> The interpretation of tumor location was made by an interventional pulmonologist (or a supervised an interventional pulmonary fellow).

#### *HAL and HOMER model development*

As previously described,<sup>1,2</sup> it was pre-specified that HAL would be a binary logistic regression model that would estimate the probability of N2 or N3 (prN2|3) vs. the probability of N0 or N1 (prN0|1) disease and that HOMER would be an ordinal logistic regression model that would estimate the probability of N0 (prN0) vs. the probability of N1 (prN1) vs. the prN2|3. The HOMER model would be an ordinal logistic regression given that its outcomes have an intrinsic order (N0 < N1 < N2|3 as assessed by EBUS-TBNA).<sup>1</sup>

For both models, it was pre-specified that a univariate analysis of the variables would first be performed, and that variables that had a p-value  $\leq 2.0$  would be candidate variables for the multivariate ordinal logistic regression model. We specified a priori that we would use stepwise backward selection with an overall p-value  $\leq 0.05$  for variables to remain in the final models.<sup>1,2</sup>

For HOMER, it was specified a priori that because it was an ordinal logistic regression model, variables identified in univariate analysis would be checked for proportional odds assumption violations using the Score Test. For variables that violated the assumption, it was specified a priori that different slope parameters for each outcome would be allowed.<sup>1</sup>

#### *Homer Model Predictions*

When testing the proportional odds assumption for HOMER, it was observed that there were proportional odds assumption violation for the variable N stage by PET-CT.<sup>1</sup> As pre-specified, different slope parameters were allowed for this variable, making HOMER a partial proportional odds model<sup>1,6</sup> with two formulas, one to predict the probability of N1 disease or higher (prN1|2|3) vs N0 disease and another to predict the prN2|3 vs prN0|1.

The formula for predicting the prN1|2|3 disease is of the following form:

$$\text{prN1|2|3} = \frac{\exp(A)}{1 + \exp(A)}$$
, where  $A = -0.89 - 0.0292 * (\text{age of the patient}) + 0.4864 * (\text{location of the tumor} = \text{central 1/3rd of the lung}) - 0.8217 * (\text{tumor histology} = \text{squamous cell carcinoma}) + 0.0635 * (\text{tumor histology} = \text{non-small cell lung carcinoma}) - 0.4097 * (\text{tumor histology} = \text{other primary lung cancer}) + 1.1738 * (\text{CT} = \text{N2|3, E7 PET} = \text{N0}) + 3.0832 * (\text{CT} = \text{N0|1, PET} = \text{N1}) + 2.9905 * (\text{CT} = \text{N2|3, PET} = \text{N1}) + 2.2595 * (\text{CT} = \text{N0|1, PET} = \text{N2|3}) + 3.7113 * (\text{CT} = \text{N2|3, PET} = \text{N2|3})$ .

The formula for predicting the prN2|3 disease is the following:  $prN2|3 = \exp(C) / (1 + \exp(C))$ , where  $C = -1.1576 - 0.0292 * (\text{age of the patient}) + 0.4864 * (\text{location of the tumor} = \text{central 1/3rd of the lung}) - 0.8217 * (\text{tumor histology} = \text{squamous cell carcinoma}) + 0.0635 * (\text{tumor histology} = \text{non-small cell lung carcinoma}) - 0.4097 * (\text{tumor histology} = \text{other primary lung cancer}) + 0.9798 * (\text{CT} = \text{N2|3, PET} = \text{N0}) + 1.5937 * (\text{CT} = \text{N0|1, PET} = \text{N1}) + 0.9323 * (\text{CT} = \text{N2|3, PET} = \text{N1}) + 2.3599 * (\text{CT} = \text{N0|1, PET} = \text{N2|3}) + 3.7486 * (\text{CT} = \text{N2|3, PET} = \text{N2|3})$ .

With the first formula we know the prN1|2|3 disease and the prN0 disease. With the second formula, we know the prN2|3 disease. Then, the prN1 disease can be obtained by subtracting the prN2|3 disease from the prN1|2|3 disease. Therefore, from these two formulas we know the prN0, prN1 and prN2|3.

#### *Random Effects Model Exploratory Analysis*

The primary analysis used a common fixed effects model for all centers since this is generalizable and could be applied everywhere. We then performed an exploratory analysis using random effects models to look test for the presence of center-level effects and to estimate how large these effects might be. We used the prospectively collected data from this study to create a random effects model with random intercept to capture center-level effects using the same variables that were used in HAL and HOMER. We label these random effects models r-HAL and r-Homer. Measures of discrimination for the random effects models are likely overly optimistic, since the models were derived from this dataset. The main purpose of assessing discrimination of r-HAL and r-HOMER is to serve as a conservative estimate of the upper limit of how well the variables used in HAL and HOMER could potentially perform if the model structure was changed to random effects. We compared the r-HAL and r-HOMER with the standard HAL and HOMER to see how much random effects modelling might improve performance.

#### *Institution-Specific Calibrated Models Following the General Calibration Method*

In the previously published HAL and HOMER reports, the discrimination of HAL and HOMER was good in all centers (ROC AUC 0.86 to 0.88), but calibration was off in two centers (HFH and JH).<sup>1,2</sup> A secondary analysis was performed in those studies to produce calibrated models specific to each participating institution, using the general calibration method proposed by Steyerberg, et al.<sup>1,2,7</sup> In this general calibration method, a logistic regression model is first fitted to the linear predictor (log odds) generated by the model as the only covariate.<sup>7</sup> The logistic regression model gives an intercept (a) and a slope (b). When the linear predictor is multiplied by b (slope) and a (intercept) is added, the raw predicted probabilities are adjusted and there is improvement in model fit with no change in model discrimination. In the HAL and HOMER reports, when performing the institution-specific calibrations the three outside institutions used for external validation (CCF, JH and HFH), the slope was set to unity for all centers (b=1) and only the institution-specific calibration intercepts (a) were estimated by doing the logistic regression models.<sup>1,2</sup>

For HAL, a binary logistic regression model, a single logistic regression was fitted with the linear predictor (i.e., the formula for predicting pN2|3 (vs. pN0|1) disease) as the only covariate; institution-specific calibration intercepts were estimated and added to the linear predictor of each center.<sup>2</sup> Model performance was then reassessed using the Brier Score, Hosmer-Lemeshow test, and ROC-AUC. The process of fitting a logistic regression to HAL's linear predictor (with slope set to 1), followed by the addition of the obtained institution-specific calibration intercepts (to their respective institutions) and assessment of model performance (Brier Score and Hosmer-Lemeshow test) was repeated until the institution-specific calibration intercepts with the lowest Brier Scores and highest Hosmer-Lemeshow p-values were found. As expected, the ROC-AUCs did not vary with the addition of calibration intercepts. The final intercepts that were used for institution-specific calibration for HAL are shown in e-Table 2.

Conversely, for HOMER, an ordinal logistic regression model with two linear predictors (i.e., one for the formula predicting pN1|2|3 (vs. pN0) disease and another for the formula predicting pN2|3 (vs. pN0|1) disease), two logistic regressions were fitted (one for each linear predictor as the only covariate); institution-specific intercepts were estimated obtained, and added to the two linear predictors of each center.<sup>1</sup> As done for HAL, model performance was then reassessed using the Brier Score, Hosmer-Lemeshow test, and ROC-AUC. The process of fitting a logistic regression to each of the two linear predictors for HOMER (with slope set to 1), followed by the addition of the obtained institution-specific calibration intercepts (to their respective linear predictors for each institution) and assessment of model performance (Brier Score and Hosmer-Lemeshow test) was repeated until the institution-specific calibration intercepts with the lowest Brier Scores and highest Hosmer-Lemeshow p-values were found. As expected, the ROC-AUCs did not vary with the addition of calibration intercepts. The final intercepts that were used for institution-specific calibration for HOMER are shown in e-Table 1.

### *Temporal Validation of Institution-Specific Calibrated Models*

The institution-specific calibrated models obtained from the secondary analysis of the HAL and HOMER reports fitted that dataset well in those studies, but they have never been temporally validated.<sup>1,2,7</sup> Therefore, we performed an exploratory analysis using the previously published institution-specific calibrated models vs. the basic HAL and HOMER models at each of the three prior external validation sites (CCF, HFH, JH). We used the annotation c-HAL and c-HOMER to represent these institution-specific calibrated models with a suffix to represent the particular institution (e.g. c-HAL-HFH is the institution specific calibrated HAL models for HFH). We assessed performance of the institution-specific, calibrated models using the ROC-AUC for discrimination and Brier Score, Hosmer-Lemeshow test, and observed vs. forecast probabilities for calibration.

### *Sample size*

Assumptions used for calculation of the sample size were based on the results obtained from a previous, slightly different version of the HAL model, where the ROC-AUC was 0.75,

with a 95% confidence interval (CI) lower limit of 0.73.<sup>8</sup> In this previous study, the prevalence of N2|3 disease was 27% with a 95% CI lower limit of 23%.<sup>8</sup>

For this study, we aimed to have a 95% CI lower limit above 0.70 (the lower limit ROC-AUC considered as acceptable) for the ROC-AUC. When calculating sample size, to be conservative, we used the previously obtained lower limits of the 95% CI of the ROC-AUC (0.73) and of the prevalence of N2|3 disease (23%) as our baseline estimates of the ROC-AUC and N2|3 prevalence, respectively. To obtain a ROC-AUC 95% CI with a lower limit of 0.70, the minimum sample size for the combined cohort was 1252 patients. We also explored a variety of other scenarios in sensitivity analysis, varying the prN2|3 disease and the ROC-AUC across the range of values deemed to be plausible, based on the 95% CI of published reports and this sample size was deemed conservative (e-Table 3). Therefore, we decided to enroll a minimum of 1300 patients across 13 institutions, where in an ideal scenario they would each enroll 100 consecutive patients, allowing assessment of discrimination and calibration to be determined for each institution. However, we observed that while some institutions rapidly enrolled patients, other smaller institutions enrolled patients more slowly. Therefore, we allowed larger institutions to continue enrolling past 100 patients while smaller institutions continued enrolling, provided they enrolled all consecutive patients, but the goal was to have as many institutions reach the 100-patient threshold as possible.

While model performance might be good for the entire cohort, prior data from AQUIRE suggested that there are between center differences in diagnostic yield, which made it important to determine whether the model performed well within each institution.<sup>9</sup> It would be possible for the model to perform well in the aggregated cohort but perform consistently poorly in particular institutions. For example, the model might perform well in 3 institutions while in 5 institutions the model could overestimate risk and be poorly calibrated and in 5 institutions the model might underestimate risk and be poorly calibrated but put together in a fixed effects model it might appear that the model had good performance. For the stratified analysis by institution, we pre-specified that for institutions enrolling  $\geq 100$  patients, discrimination and calibration performance would be assessed, since an  $n=100$  would provide reasonably precise estimators of calibration and discrimination performance. If an institution enrolled less than 100 patients but  $\geq 50$  patients, only discrimination performance would be assessed, since observed vs. predicted plots would have too few patients in each decile and would therefore be unreliable. Finally, we had estimated that a sample size of 50 or more patients was necessary to obtain a stable ROC-AUC, so we pre-specified that if institutions enrolled less than 50 patients, they would be excluded from stratified analysis altogether, since estimates would be unreliable.

## Results

### *Random Effects Model*

After performing the random effects models for HAL and HOMER using random intercepts, the r-HAL formula for predicting prN2|3 is:

$$prN2|3 = \frac{\exp(A)}{1+\exp(A)} \text{ where } A = 0.2505 - 2.1946 - 0.0172 * (\text{age of patient}) + 0.2956 * \\ I(\text{location of the tumor} = \text{central third of the lung}) - 0.6324 * I(\text{tumor histology} = \\ \text{squamous cell carcinoma}) - 0.5634 * I(\text{Nonsmall cell lung carcinoma}) - 0.8650 * \\ I(\text{other primary lung cancer}) + 1.2905 * I(\text{CT} = \text{N2|3, PET} = \text{N0}) + 1.1786 * I(\text{CT} = \text{N0|N1, PET} = \text{N1}) + \\ 1.5064 * I(\text{CT} = \text{N2|N3, PET} = \text{N1}) + 3.0914 * I(\text{CT} = \text{N0|1, PET} = \text{N2|3}) + 4.1364 * I(\text{CT} = \\ \text{N2|3, PET} = \text{N2|3})$$

Note: I(X) is an indicator function and equals 1 if X is true, otherwise equals 0

The r-HOMER formula for predicting the prN1|2|3 disease is:

$$prN1|2|3 = \frac{\exp(B)}{1+\exp(B)} \text{ where } B = 0.1246 - 1.815 - 0.0120 * (\text{age of the patient}) + 0.3421 * \\ I(\text{location of the tumor} = \text{central 1/3rd of the lung}) - 0.4426 * I(\text{tumor histology} = \\ \text{squamous cell carcinoma}) - 0.3345 * I(\text{tumor histology} = \text{non - small cell lung carcinoma}) - 0.4194 * \\ I(\text{tumor histology} = \text{other primary lung cancer}) + 0.5533 * I(\text{CT} = \text{N2|3, PET} = \text{N0}) + 2.5547 * I(\text{CT} = \\ \text{N0|1, PET} = \text{N1}) + 3.0056 * I(\text{CT} = \text{N2|3, PET} = \text{N1}) + 2.4933 * I(\text{CT} = \text{N0|1, PET} = \text{N2|3}) + 3.6851 * \\ I(\text{CT} = \text{N2|3, PET} = \text{N2|3})$$

Note: I(X) is an indicator function and equals 1 if X is true, otherwise equals 0.

The r-HOMER formula for predicting the prN2|3 disease is:

$$prN2|3 = \frac{\exp(C)}{1+\exp(C)} \text{ where } C = -0.0150 - 2.6241 - 0.0120 * (\text{age of the patient}) + 0.3421 * \\ I(\text{location of the tumor} = \text{central 1/3rd of the lung}) - 0.4426 * I(\text{tumor histology} = \\ \text{squamous cell carcinoma}) - 0.3345 * I(\text{tumor histology} = \text{nonsmall cell lung carcinoma}) - 0.4194 * \\ I(\text{tumor histology} = \text{other primary lung cancer}) + 1.2151 * I(\text{CT} = \text{N2|3, PET} = \text{N0}) + 1.0058 * I(\text{CT} = \\ \text{N0|1, PET} = \text{N1}) + 0.6209 * I(\text{CT} = \text{N2|3, PET} = \text{N1}) + 2.8754 * I(\text{CT} = \text{N0|1, PET} = \text{N2|3}) + 4.1919 * \\ I(\text{CT} = \text{N2|3, PET} = \text{N2|3})$$

Note: I(X) is an indicator function and equals 1 if X is true, otherwise equals 0.

It follows that using HOMER, the  $prN0 = 1 - prN1|2|3$  and  $prN1 = prN1|2|3 - prN2|3$ .

### *Temporal Validation of Institution-Specific Calibrated Models*

Results of the exploratory analysis comparing baseline HAL vs. c-HAL and baseline HOMER vs. c-HOMER at CCF, JH, and HFH is shown in Tables E4 and E6, respectively. For all three centers, baseline HAL and baseline HOMER performed better than c-HAL and c-HOMER in all tests of calibration (Brier score, observed vs. forecast probabilities and Hosmer-Lemeshow p-value). This suggests that previously developed models using institution-specific calibration intercepts might be overfitted (i.e., modeling of the residual variation or noise). Overfitted models provide results that are overly optimistic when first developed, however the models are not a true representation of reality and therefore are not reproducible in different data sets and perform poorly when applied to new data sets.<sup>10</sup> In this exploratory analysis, this pattern is observed for the institution-specific calibrated models, suggesting that calibration resulted in overfitting of the models. Conversely, the baseline HAL and HOMER models continued to perform well across multiple institutions.

### *Estimation of the post-test probability of N2 or N3 disease by EBUS using HAL*

After estimating the probability of N2|3 disease by EBUS using HAL, the predictions can be used to estimate the post-test probability of N2 or N3 disease following a negative EBUS result. In order to calculate the post-test probability of N2|3 disease following a negative EBUS, the following assumptions are made: the sensitivity of EBUS is 0.89 as reported by the ACCP guidelines, specificity of EBUS is 1.0 and therefore the likelihood ratio for negative EBUS =  $(1 - \text{sensitivity}) / \text{specificity} = 0.11$ .<sup>11-15</sup>

The calculations are as follows:

- Pre-test probability of N2|3 disease =  $\text{prN2|3} / \text{sensitivity of EBUS when PET-CT N stage is N2}$
- Then convert the pre-test probability of N2|3 disease to pre-test odds =  $\text{pre-test probability of N2|3 disease} / (1 - \text{pre-test probability of N2|3 disease})$
- Following Bayes Theorem, post-test disease odds =  $\text{pre-test odds} \times \text{likelihood ratio for negative EBUS} = \text{pre-test odds of N2|3 disease} \times 0.11$
- Convert the post-test disease odds to post-test probability following a negative EBUS of N2|3 as follows:  $\text{post-test probability of disease} = \text{post-test odds of N2|3 disease} / (1 + \text{post-test odds of N2|3 disease})$ .

## **Discussion**

HAL and HOMER are two clinical prediction rules that estimate malignant nodal involvement as determined by EBUS-TBNA. Previous studies predicted N2|3 disease as determined by mediastinoscopy or thoracotomy in order to guide surgical decisions.<sup>16-22</sup> However, current guidelines have now replaced mediastinoscopy with EBUS-TBNA as the first sampling technique of the mediastinum in patients with NSCLC<sup>11</sup>, so clinical prediction rules for malignant nodal involvement as determined by EBUS-TBNA are useful.



Previous studies from the AQuIRE registry have suggested that significant institution-specific differences can occur in terms of bronchoscopic diagnostic yield, with EBUS-TBNA yield varying from 37%-54% which might impact model performance.<sup>9,23</sup> Consistent with AQuIRE, in the random effects model we found evidence of center-level effects. However, accounting for these center-level effects did not improve model performance significantly. In addition, random effects models, even if more accurate, are less generalizable and therefore not practical for clinicians, since they require data from each institution to make predictions. We also tested HAL and HOMER vs. our previously published institution-specific calibrated models that used the general calibration method. Both HAL and HOMER outperformed their institution-specific counterparts, suggesting that the base HAL and HOMER models are robust and stable over time.

Given that mediastinoscopy cannot sample N1 nodes<sup>24</sup>, the true gold standard for mediastinal and hilar staging is thoracotomy. So, one could argue that it would be best to predict N0, N1 and N2|3 disease as determined by thoracotomy. However, that would be necessary if we were trying to determine the sensitivity and specificity of EBUS-TBNA or to predict the pretest probability of nodal disease. But this study is not determining sensitivity and specificity of EBUS-TBNA, so use of a surgical gold-standard is not applicable. This study is also not predicting a pretest probability; it is predicting diagnostic yield of EBUS-TBNA for N0, N1, or N2|3 disease. The positive predictive value (PPV) of EBUS-TBNA is close to 100%, so we assert that predicting the diagnostic yield of EBUS-TBNA nodal involvement is clinically useful. Below some threshold diagnostic yield, EBUS-TBNA will not be cost-effective. We should note that the prediction of diagnostic yield for a test is different than predicting the results of the gold standard (thoracotomy in this case). A rule which accurately predicts the pretest probability of nodal disease by thoracotomy does not necessarily imply whether a given test is warranted or not.

For instance, consider a case where conventional TBNA vs. EBUS-TBNA are being evaluated for a patient. A rule that accurately predicts the probability of nodal disease by thoracotomy does not inform us whether conventional TBNA is warranted. What we want to know is the probability the test (conventional TBNA) will be positive and the probability that the alternative test (EBUS-TBNA) will be positive. A prediction rule based on thoracotomy results would be good for estimating the pretest probability of disease but could not tell us which test is better or if either test is necessary.

To guide the decision on whether a given test needs to be done requires information on the diagnostic yield of that specific test in a patient, which is different than the probability that there is disease present as assessed by the gold standard (i.e., pretest probability). If the sensitivity of conventional TBNA or EBUS-TBNA was fixed across all groups, then diagnostic yield would be equal to the pretest probability multiplied by sensitivity, since TBNA specificity is essentially 100%. But if sensitivity varies significantly across strata such an analytic approach would not work, and a recent meta-analysis reported that the sensitivity of EBUS-TBNA does vary depending on the PET-CT status of the mediastinal lymph nodes.<sup>25</sup> For instance, studies demonstrated that sensitivity of EBUS ranged from 13.6% to 94.1%<sup>26,27</sup> in patients with PET-CT N0 disease, from 67% to 82%<sup>27,28</sup> in patients with PET-CT N1 disease, and from 72.7% to 94.2%<sup>13,29-32</sup> in patients with PET-CT N2|3 disease. Therefore, it is not appropriate to use a single pooled estimate of sensitivity for all patients.

A more empiric approach is to directly measure and predict diagnostic yield for EBUS-TBNA, which our prediction rules does. Although our study has the weakness of sacrificing knowledge of the true disease prevalence because we could not do thoracotomy in all patients with negative EBUS-TBNA results, the ability to predict diagnostic yield is practical and clinically relevant.

Another consideration regarding the use of thoracotomy as the basis for prediction rules regarding nodal disease is the potential for selection bias and generalizability of results across various patient populations. Prediction rules that estimate the probability of nodal involvement based on thoracotomy would not necessarily be generalizable to patients being considered for SABR because of inability to tolerate surgical resection. Indeed, a study that developed a prediction rule for malignant lymph node involvement as determined by surgical staging would risk selection bias, because non-surgical candidates considered for therapy with SABR would be excluded. Such a prediction rule still might work in non-surgical candidates, but it would require additional validation and would be informative in regard to pretest probability but not whether a EBUS-TBNA should be done – for that we need a prediction of diagnostic yield. HOMER provides that prediction of diagnostic yield.

Our study has strengths and weaknesses that are worth mentioning. One of the strengths is that both HAL and HOMER were independently validated in 13 hospitals. While there was evidence of center-level effects, both models performed well across multiple institutions in terms of their ability to predict malignant lymph node involvement. Also, HAL and HOMER demonstrated stability through a 10-year time-period in four institutions. So, even though both models have the weakness that the Hosmer-Lemeshow test showed some statistically significant calibration error beyond random variation, the magnitude of the calibration error is relatively modest such that the models remain informative. Another strength that our study has is that HOMER can inform the decision on whether EBUS-TBNA should be done in patients who are being considered for SABR. Mediastinoscopy cannot sample N1 nodes,<sup>24</sup> so prediction rules that estimate the probability of nodal involvement as assessed by mediastinoscopy would not be sufficient for this problem.

## References

1. Martinez-Zayas G, Almeida FA, Simoff MJ, et al. A Prediction Model to Help with Oncologic Mediastinal Evaluation for Radiation: HOMER. *Am J Respir Crit Care Med*. 2020;201(2):212-223.
2. O'Connell OJ, Almeida FA, Simoff MJ, et al. A Prediction Model to Help with the Assessment of Adenopathy in Lung Cancer: HAL. *Am J Respir Crit Care Med*. 2017;195(12):1651-1660.
3. Gould MK, Kuschner WG, Rydzak CE, et al. Test performance of positron emission tomography and computed tomography for mediastinal staging in patients with non-small-cell lung cancer: a meta-analysis. *Ann Intern Med*. 2003;139(11):879-892.
4. Casal RF, Sepesi B, Sagar AS, et al. Centrally located lung cancer and risk of occult nodal disease: an objective evaluation of multiple definitions of tumour centrality with dedicated imaging software. *Eur Respir J*. 2019;53(5).
5. Casal RF, Vial MR, Miller R, et al. What Exactly Is a Centrally Located Lung Tumor? Results of an Online Survey. *Annals of the American Thoracic Society*. 2017;14(1):118-123.
6. Williams RA. Generalized ordered logit/partial proportional odds models for ordinal dependent variables. 2006;Volume 06:58-82.[http://ageconsearch.umn.edu/record/117557/files/sjart\\_st0097.pdf](http://ageconsearch.umn.edu/record/117557/files/sjart_st0097.pdf). Accessed 2006.
7. Steyerberg E. *Clinical Prediction Models: A Practical Approach to Development, Validation, and Updating*. New York, NY: Springer; 2009.
8. O'Connell OJ; Lazarus R ST, Grosu HB, Morice RC, Jimenez CA, Eapen GA, Ost DE. . Clinical Predictors of Hilar N3 Disease in Non-small Cell Lung Cancer Staging by EBUS. American Thoracic Society(A5361)2015.
9. Ost DE, Ernst A, Lei X, et al. Diagnostic yield of endobronchial ultrasound-guided transbronchial needle aspiration: results of the AQUIRE Bronchoscopy Registry. *Chest*. 2011;140(6):1557-1566.
10. Babyak MA. What you see may not be what you get: a brief, nontechnical introduction to overfitting in regression-type models. *Psychosom Med*. 2004;66(3):411-421.
11. Silvestri GA, Gonzalez AV, Jantz MA, et al. Methods for staging non-small cell lung cancer: Diagnosis and management of lung cancer, 3rd ed: American College of Chest Physicians evidence-based clinical practice guidelines. *Chest*. 2013;143(5 Suppl):e211S-e250S.
12. Fielding D, Windsor M. Endobronchial ultrasound convex-probe transbronchial needle aspiration as the first diagnostic test in patients with pulmonary masses and associated hilar or mediastinal nodes. *Intern Med J*. 2009;39(7):435-440.
13. Yasufuku K, Chiyo M, Koh E, et al. Endobronchial ultrasound guided transbronchial needle aspiration for staging of lung cancer. *Lung Cancer*. 2005;50(3):347-354.

14. Cetinkaya E, Seyhan EC, Ozgul A, et al. Efficacy of convex probe endobronchial ultrasound (CP-EBUS) assisted transbronchial needle aspiration for mediastinal staging in non-small cell lung cancer cases with mediastinal lymphadenopathy. *Ann Thorac Cardiovasc Surg*. Vol 17. Japan2011:236-242.
15. Herth FJ, Eberhardt R, Vilmann P, Krasnik M, Ernst A. Real-time endobronchial ultrasound guided transbronchial needle aspiration for sampling mediastinal lymph nodes. *Thorax*. 2006;61(9):795-798.
16. Shafazand S, Gould MK. A clinical prediction rule to estimate the probability of mediastinal metastasis in patients with non-small cell lung cancer. *J Thorac Oncol*. 2006;1(9):953-959.
17. Zhang Y, Sun Y, Xiang J, Hu H, Chen H. A prediction model for N2 disease in T1 non-small cell lung cancer. *J Thorac Cardiovasc Surg*. 2012;144(6):1360-1364.
18. Chen K, Yang F, Jiang G, Li J, Wang J. Development and validation of a clinical prediction model for N2 lymph node metastasis in non-small cell lung cancer. *Ann Thorac Surg*. 2013;96(5):1761-1768.
19. Koike T, Koike T, Yamato Y, Yoshiya K, Toyabe S. Predictive risk factors for mediastinal lymph node metastasis in clinical stage IA non-small-cell lung cancer patients. *J Thorac Oncol*. 2012;7(8):1246-1251.
20. Farjah F, Lou F, Sima C, Rusch VW, Rizk NP. A prediction model for pathologic N2 disease in lung cancer patients with a negative mediastinum by positron emission tomography. *J Thorac Oncol*. 2013;8(9):1170-1180.
21. Tsutani Y, Murakami S, Miyata Y, Nakayama H, Yoshimura M, Okada M. Prediction of lymph node status in clinical stage IA squamous cell carcinoma of the lung. *Eur J Cardiothorac Surg*. 2015;47(6):1022-1026.
22. Tsutani Y, Miyata Y, Nakayama H, et al. Prediction of pathologic node-negative clinical stage IA lung adenocarcinoma for optimal candidates undergoing sublobar resection. *J Thorac Cardiovasc Surg*. 2012;144(6):1365-1371.
23. Ost DE, Ernst A, Lei X, et al. Diagnostic Yield and Complications of Bronchoscopy for Peripheral Lung Lesions. Results of the AQUIRE Registry. *Am J Respir Crit Care Med*. 2016;193(1):68-77.
24. Yasufuku K, Pierre A, Darling G, et al. A prospective controlled trial of endobronchial ultrasound-guided transbronchial needle aspiration compared with mediastinoscopy for mediastinal lymph node staging of lung cancer. *J Thorac Cardiovasc Surg*. 2011;142(6):1393-1400 e1391.
25. Gu P, Zhao YZ, Jiang LY, Zhang W, Xin Y, Han BH. Endobronchial ultrasound-guided transbronchial needle aspiration for staging of lung cancer: a systematic review and meta-analysis. *Eur J Cancer*. 2009;45(8):1389-1396.
26. El-Osta H, Jani P, Mansour A, Rascoe P, Jafri S. Endobronchial Ultrasound for Nodal Staging of Patients with Non-Small-Cell Lung Cancer with Radiologically Normal Mediastinum. A Meta-Analysis. *Ann Am Thorac Soc*. 2018;15(7):864-874.
27. Vial MR, O'Connell OJ, Grosu HB, et al. Diagnostic performance of endobronchial ultrasound-guided mediastinal lymph node sampling in early stage non-small cell lung cancer: A prospective study. *Respirology*. 2018;23(1):76-81.

28. Yasufuku K, Nakajima T, Waddell T, Keshavjee S, Yoshino I. Endobronchial ultrasound-guided transbronchial needle aspiration for differentiating N0 versus N1 lung cancer. *Ann Thorac Surg.* 2013;96(5):1756-1760.
29. Lee HS, Lee GK, Kim MS, et al. Real-time endobronchial ultrasound-guided transbronchial needle aspiration in mediastinal staging of non-small cell lung cancer: how many aspirations per target lymph node station? *Chest.* 2008;134(2):368-374.
30. Gilbert S, Wilson DO, Christie NA, et al. Endobronchial ultrasound as a diagnostic tool in patients with mediastinal lymphadenopathy. *Ann Thorac Surg.* 2009;88(3):896-900; discussion 901-892.
31. Hwangbo B, Kim SK, Lee HS, et al. Application of endobronchial ultrasound-guided transbronchial needle aspiration following integrated PET/CT in mediastinal staging of potentially operable non-small cell lung cancer. *Chest.* 2009;135(5):1280-1287.
32. Fréchet B, Kazakov J, Thiffault V, Ferraro P, Liberman M. Diagnostic Accuracy of Mediastinal Lymph Node Staging Techniques in the Preoperative Assessment of Nonsmall Cell Lung Cancer Patients. *J Bronchology Interv Pulmonol.* 2018;25(1):17-24.

**e-Table 1. Exclusion Criteria for Patients of the Combined Validation Data**

| Reason of exclusion                                                                                                   | Number of patients meeting exclusion criteria |
|-----------------------------------------------------------------------------------------------------------------------|-----------------------------------------------|
| PET <sup>a</sup> was not performed prior to treatment                                                                 | 130                                           |
| Clinical-radiographic suspicion of a synchronous primary malignancy                                                   | 2                                             |
| Pathology report for the biopsy of the lung tumor demonstrated benign histology                                       | 69                                            |
| Clinical-radiographic M stage was M1                                                                                  | 94                                            |
| Evidence of T4 invasion by CT <sup>b</sup>                                                                            | 31                                            |
| Systematic EBUS-sampling was not performed                                                                            | 12                                            |
| Pathology report for the biopsy of the lung tumor demonstrated small cell lung cancer                                 | 49                                            |
| Primary site of malignancy was different than the lung (e.g., primary site of cancer was breast with lung metastasis) | 3                                             |
| Total                                                                                                                 | 390                                           |

*Definitions of abbreviations:* PET: Positron Emission Tomography; CT: Computed Tomography Note: All patients had at least one reason of exclusion recorded and some patients had more than one reason of exclusion recorded (e.g., a patient both had evidence of T4 invasion by CT and PET was not performed prior to treatment).

**e-Table 2. Institution-Specific Calibration Intercepts for the HAL and HOMER Models**

| <b>Linear predictor</b>                                                                                  | <b>Cleveland Clinic Foundation</b> | <b>Henry Ford Hospital</b> | <b>Johns Hopkins</b> |
|----------------------------------------------------------------------------------------------------------|------------------------------------|----------------------------|----------------------|
| HAL model<br>Calibration intercept <sup>a</sup> for the linear predictor for prN2 3 (vs. N0 1) disease   | +0.26                              | +0.92                      | 0.89                 |
| HOMER model<br>Calibration intercept <sup>b</sup> for the linear predictor for prN1 2 3 (vs. N0) disease | +0.18                              | +1.06                      | +1.10                |
| Calibration intercept <sup>b</sup> for the linear predictor for prN2 3 (vs. N0 1) disease                | +0.26                              | +0.90                      | +0.90                |

*Definition of abbreviations:* prN2|3: probability of N2 or N3 disease; N0|1: N0 or N1; prN1|2|3: probability of N1 disease or higher

Note: The institution-specific calibration intercepts were calculated following the general calibration method proposed by Steyerberg et. al. in the HAL<sup>a</sup> and HOMER<sup>b</sup> reports.<sup>1,2,7</sup>

**e-Table 3. Sample Size Calculation of the Entire Cohort Based on a Previous Version of HAL**

| Confidence Level <sup>a</sup> | Total Subjects <sup>b</sup> | % of N2 3 <sup>c</sup> | N stage N2 3 <sup>d</sup> | N stage N0 1 <sup>e</sup> | Sample AUC <sup>f</sup> | Distance from AUC to Limit <sup>g</sup> | Lower 95% Conf. Limit <sup>h</sup> |
|-------------------------------|-----------------------------|------------------------|---------------------------|---------------------------|-------------------------|-----------------------------------------|------------------------------------|
| 0.950                         | 1322                        | 23                     | 304                       | 1018                      | 0.700                   | 0.030                                   | 0.670                              |
| 0.950                         | 1279                        | 24                     | 307                       | 972                       | 0.700                   | 0.030                                   | 0.670                              |
| 0.950                         | 1236                        | 25                     | 309                       | 927                       | 0.700                   | 0.030                                   | 0.670                              |
| 0.950                         | 1200                        | 26                     | 312                       | 888                       | 0.700                   | 0.030                                   | 0.670                              |
| 0.950                         | 1167                        | 27                     | 315                       | 852                       | 0.700                   | 0.030                                   | 0.670                              |
| 0.950                         | 1132                        | 28                     | 317                       | 815                       | 0.700                   | 0.030                                   | 0.670                              |
| 0.950                         | 1103                        | 29                     | 320                       | 783                       | 0.700                   | 0.030                                   | 0.670                              |
| 0.950                         | 1077                        | 30                     | 323                       | 754                       | 0.700                   | 0.030                                   | 0.670                              |
| <b>0.950</b>                  | <b>1252</b>                 | <b>23</b>              | <b>288</b>                | <b>964</b>                | <b>0.730</b>            | <b>0.030</b>                            | <b>0.700</b>                       |
| 0.950                         | 1213                        | 24                     | 291                       | 922                       | 0.730                   | 0.030                                   | 0.700                              |
| 0.950                         | 1172                        | 25                     | 293                       | 879                       | 0.730                   | 0.030                                   | 0.700                              |
| 0.950                         | 1135                        | 26                     | 295                       | 840                       | 0.730                   | 0.030                                   | 0.700                              |
| 0.950                         | 1100                        | 27                     | 297                       | 803                       | 0.730                   | 0.030                                   | 0.700                              |
| 0.950                         | 1071                        | 28                     | 300                       | 771                       | 0.730                   | 0.030                                   | 0.700                              |
| 0.950                         | 1041                        | 29                     | 302                       | 739                       | 0.730                   | 0.030                                   | 0.700                              |
| 0.950                         | 1017                        | 30                     | 305                       | 712                       | 0.730                   | 0.030                                   | 0.700                              |
| 0.950                         | 1200                        | 23                     | 276                       | 924                       | 0.750                   | 0.030                                   | 0.720                              |
| 0.950                         | 1158                        | 24                     | 278                       | 880                       | 0.750                   | 0.030                                   | 0.720                              |
| 0.950                         | 1120                        | 25                     | 280                       | 840                       | 0.750                   | 0.030                                   | 0.720                              |
| 0.950                         | 1085                        | 26                     | 282                       | 803                       | 0.750                   | 0.030                                   | 0.720                              |
| 0.950                         | 1052                        | 27                     | 284                       | 768                       | 0.750                   | 0.030                                   | 0.720                              |
| 0.950                         | 1021                        | 28                     | 286                       | 735                       | 0.750                   | 0.030                                   | 0.720                              |





|       |      |    |     |     |       |       |       |
|-------|------|----|-----|-----|-------|-------|-------|
| 0.950 | 993  | 29 | 288 | 705 | 0.750 | 0.030 | 0.720 |
| 0.950 | 970  | 30 | 291 | 679 | 0.750 | 0.030 | 0.720 |
| 0.950 | 1139 | 23 | 262 | 877 | 0.770 | 0.030 | 0.740 |
| 0.950 | 1100 | 24 | 264 | 836 | 0.770 | 0.030 | 0.740 |
| 0.950 | 1064 | 25 | 266 | 798 | 0.770 | 0.030 | 0.740 |
| 0.950 | 1027 | 26 | 267 | 760 | 0.770 | 0.030 | 0.740 |
| 0.950 | 996  | 27 | 269 | 727 | 0.770 | 0.030 | 0.740 |
| 0.950 | 968  | 28 | 271 | 697 | 0.770 | 0.030 | 0.740 |
| 0.950 | 941  | 29 | 273 | 668 | 0.770 | 0.030 | 0.740 |
| 0.950 | 917  | 30 | 275 | 642 | 0.770 | 0.030 | 0.740 |
| 0.950 | 1074 | 23 | 247 | 827 | 0.790 | 0.030 | 0.760 |
| 0.950 | 1033 | 24 | 248 | 785 | 0.790 | 0.030 | 0.760 |
| 0.950 | 1000 | 25 | 250 | 750 | 0.790 | 0.030 | 0.760 |
| 0.950 | 965  | 26 | 251 | 714 | 0.790 | 0.030 | 0.760 |
| 0.950 | 937  | 27 | 253 | 684 | 0.790 | 0.030 | 0.760 |
| 0.950 | 911  | 28 | 255 | 656 | 0.790 | 0.030 | 0.760 |
| 0.950 | 883  | 29 | 256 | 627 | 0.790 | 0.030 | 0.760 |
| 0.950 | 860  | 30 | 258 | 602 | 0.790 | 0.030 | 0.760 |
| 0.950 | 478  | 23 | 110 | 368 | 0.700 | 0.050 | 0.650 |
| 0.950 | 463  | 24 | 111 | 352 | 0.700 | 0.050 | 0.650 |

<sup>a</sup>Confidence Level=the proportion of confidence intervals (constructed with this same confidence level, sample size, etc.) that would contain the true coefficient alpha; <sup>b</sup>N= the total number of subjects sampled; <sup>c</sup>Percentage of patients with N2 or N3 disease where this percentage=  $100 \times N2|3 / N$ ; <sup>d</sup>N2|3: number of subjects with N2 or N3 disease; <sup>e</sup>N0|1: number of subjects with N0 or N1 disease; <sup>f</sup>Sample AUC: the anticipated value of the sample area under the receiver operating characteristic curve; <sup>g</sup>Distance from AUC to Limit: the distance from the lower limit to the AUC; <sup>h</sup>Lower Confidence Limit is the actual limit that would result from a dataset with these statistics.

Note: shown in bold is the minimum target sample size for the combined cohort, where AUC=0.73, lower limit 95% CI=0.70, and prevalence of N2|3 disease=23%.

**e-Table 4: Clinical Characteristics by N Stage (N0|1 vs. N2|3) as Determined by EBUS-TBNA for All Included Patients (n=1799).**

| Variable                    | N    | N0 1<br>(n=1370) | N2 3<br>(n=429) | P-value |
|-----------------------------|------|------------------|-----------------|---------|
| Age, M (SD)                 | 1799 | 70.0 (9.5)       | 67.6 (9.7)      | <0.001  |
| Gender, n (%)               | 1799 |                  |                 | 0.170   |
| Female                      |      | 587 (76.1)       | 184 (23.9)      |         |
| Male                        |      | 783 (76.2)       | 245 (23.8)      |         |
| Race, n (%)                 | 1785 |                  |                 | 0.222   |
| Asian                       |      | 59 (83.1)        | 12 (16.9)       |         |
| Black                       |      | 192 (77.1)       | 57 (22.9)       |         |
| Other                       |      | 39 (66.1)        | 20 (33.9)       |         |
| White or Caucasian          |      | 1066 (76.1)      | 334 (23.9)      |         |
| ASA, n (%)                  | 1779 |                  |                 | 0.012   |
| 0                           |      | 5 (100.0)        | 0 (0.0)         |         |
| 1                           |      | 18 (58.1)        | 13 (41.9)       |         |
| 2                           |      | 179 (70.7)       | 74 (29.3)       |         |
| 3                           |      | 1094 (77.5)      | 317 (22.5)      |         |
| 4                           |      | 74 (74.8)        | 25 (25.3)       |         |
| Tobacco history, n (%)      | 1779 |                  |                 | 0.330   |
| Current                     |      | 391 (74.4)       | 133 (25.4)      |         |
| Never used                  |      | 159 (79.9)       | 40 (20.1)       |         |
| Prior use                   |      | 820 (76.2)       | 256 (23.8)      |         |
| Tumor size, M (SD)          | 1779 | 4.49 (2.22)      | 3.94 (2.34)     | <0.001  |
| Tumor.size , n (%)          | 1779 |                  |                 | <0.001  |
| <=3 cm                      |      | 740 (81.1)       | 173 (19.0)      |         |
| >3 cm but <=5 cm            |      | 366 (70.8)       | 151 (29.2)      |         |
| >5cm                        |      | 264 (71.5)       | 105 (28.5)      |         |
| Lobar Location, n (%)       | 1799 |                  |                 | <0.001  |
| Left lower lobe             |      | 202 (80.5)       | 49 (19.5)       |         |
| Left upper or lingula       |      | 400 (82.0)       | 88 (18.0)       |         |
| Right lower or middle lobe  |      | 313 (73.1)       | 115 (26.9)      |         |
| Right upper lobe            |      | 455 (72.0)       | 177 (28.0)      |         |
| Tumor location, n (%)       | 1799 |                  |                 | <0.001  |
| Central 1/3rd               |      | 324 (67.6)       | 155 (32.4)      |         |
| Outer 2/3rd                 |      | 1046 (79.2)      | 274 (20.8)      |         |
| Histology, n (%)            | 1799 |                  |                 | 0.153   |
| Adenocarcinoma              |      | 722 (74.4)       | 249 (25.6)      |         |
| Other                       |      | 57 (83.8)        | 11 (16.8)       |         |
| Squamous                    |      | 454 (77.3)       | 133 (22.7)      |         |
| Poorly-differentiated NSCLC |      | 137 (79.2)       | 36 (20.8)       |         |

|                                |      |             |            |        |
|--------------------------------|------|-------------|------------|--------|
| Nodule in the same lobe, n (%) | 1799 |             |            | 0.024  |
| No                             |      | 1190 (77.1) | 354 (22.9) |        |
| Yes                            |      | 180 (70.6)  | 75 (29.4)  |        |
| Nodule in the same lung, n (%) | 1799 |             |            | <0.001 |
| No                             |      | 1279 (77.2) | 377 (22.8) |        |
| Yes                            |      | 91 (63.6)   | 52 (36.4)  |        |
| N stage CT, n (%)              | 1799 |             |            | <0.001 |
| 0                              |      | 817 (94.0)  | 52 (6.0)   |        |
| 1                              |      | 181 (85.8)  | 30 (14.2)  |        |
| 2                              |      | 261 (53.9)  | 223 (46.1) |        |
| 3                              |      | 111 (47.2)  | 124 (52.8) |        |
| N stage PET, n (%)             | 1799 |             |            | <0.001 |
| 0                              |      | 822 (96.7)  | 28 (3.2)   |        |
| 1                              |      | 238 (91.5)  | 22 (8.5)   |        |
| 2                              |      | 174 (40.6)  | 255 (59.4) |        |
| 3                              |      | 136 (52.3)  | 124 (48.7) |        |
| N stage by PET-CT, n (%)       | 1799 |             |            | <0.001 |
| CT=N0 or N1, PET=N0            |      | 708 (97.5)  | 18 (2.4)   |        |
| CT=N0 or N1, PET=N1            |      | 199 (91.7)  | 18 (8.3)   |        |
| CT=N0 or N1, PET=N2 3          |      | 91 (66.4)   | 46 (33.6)  |        |
| CT=N2 or N3, PET=N0            |      | 114 (91.9)  | 10 (8.1)   |        |
| CT=N2 or N3, PET=N1            |      | 39 (90.7)   | 4 (9.3)    |        |
| CT=N2 or N3, PET=N2 3          |      | 219 (36.7)  | 333 (60.3) |        |
| M stage, n (%)                 | 1799 |             |            | 0.256  |
| M0                             |      | 1283 (76.5) | 395 (23.5) |        |
| Mx                             |      | 87 (71.9)   | 34 (28.1)  |        |

*Definition of abbreviations:* NSCLC: non-small cell lung cancer; N0|1: N0 or N1 disease; N2|3: N2 or N3 disease

**e-Table 5. Comparison of HAL with Institution Specific Calibrated HAL Model at Three Institutions**

| Performance Measure                                     | Cleveland Clinic Foundation | Henry Ford Hospital | Johns Hopkins       |
|---------------------------------------------------------|-----------------------------|---------------------|---------------------|
| Brier Score                                             |                             |                     |                     |
| HAL                                                     | 0.092                       | 0.136               | 0.141               |
| Institution specific c-HAL <sup>a</sup>                 | 0.095                       | 0.160               | 0.167               |
| Hosmer-Lemeshow p-value                                 |                             |                     |                     |
| HAL                                                     | 0.70                        | 0.29                | 0.28                |
| Institution specific c-HAL <sup>a</sup>                 | 0.29                        | <0.001              | <0.001              |
| Observed vs. Forecast                                   |                             |                     |                     |
| Observed prN2 3                                         | 0.181                       | 0.269               | 0.285               |
| HAL forecast prN2 3                                     | 0.216                       | 0.290               | 0.303               |
| Institution specific c-HAL <sup>a</sup> forecast prN2 3 | 0.247                       | 0.416               | 0.422               |
| ROC-AUC <sup>b</sup>                                    |                             |                     |                     |
| HAL                                                     | 0.913 (0.879-0.945)         | 0.848 (0.771-0.924) | 0.838 (0.776-0.899) |
| Institution specific c-HAL <sup>a</sup>                 | 0.913 (0.879-0.945)         | 0.848 (0.771-0.924) | 0.838 (0.776-0.899) |

*Definition of abbreviations:* prN2|3: probability of N2 or N3 disease; ROC-AUC: Area Under the Receiver Operating Characteristic Curve.

<sup>a</sup>c-HAL: calibrated HAL model, generated by using the general calibration method applied to a specific institution's prior data set.

<sup>b</sup>Note that the ROC AUC is the same for HAL and the c-HAL models. The general calibration method used to generate the c-HAL models does not impact model discrimination, it only changes calibration. When measuring calibration, lower Brier scores are better; higher Hosmer-Lemeshow p-values are better; forecast probabilities closer to the observed probabilities are better. The base HAL model outperforms the c-HAL model in every institution, as measured by Brier score, Hosmer-Lemeshow test, and observed vs. predicted plots.

**e-Table 6: Clinical Characteristics by N Stage (N0 vs. N1 vs. N2|3) as Determined by EBUS-TBNA for All Non-MD Anderson Included Patients (n=1244).**

| Variable                   | N    | N0 (n=800)  | N1 (n=122)  | N2 3 (n=322) | P-value |
|----------------------------|------|-------------|-------------|--------------|---------|
| Age, M (SD)                | 1244 | 70.2 (9.5)  | 69.4 (9.9)  | 67.5 (9.6)   | <0.001  |
| Gender, n (%)              | 1244 |             |             |              | 0.470   |
| Female                     |      | 338 (64.8)  | 45 (8.6)    | 139 (26.6)   |         |
| Male                       |      | 462 (64.)   | 77 (10.7)   | 183 (23.4)   |         |
| Race, n (%)                | 1234 |             |             |              | 0.049   |
| Asian                      |      | 31 (83.8)   | 2 (5.4)     | 4 (10.8)     |         |
| Black                      |      | 147 (68.4)  | 18 (8.4)    | 50 (23.3)    |         |
| Other                      |      | 26 (50.0)   | 7 (13.5)    | 19 (36.6)    |         |
| White or Caucasian         |      | 591 (63.6)  | 94 (10.1)   | 245 (26.3)   |         |
| ASA, n (%)                 | 1244 |             |             |              | 0.209   |
| 0                          |      | 4 (80.0)    | 1 (20.0)    | 0 (0.0)      |         |
| 1                          |      | 16 (53.3)   | 1 (3.3)     | 13 (43.3)    |         |
| 2                          |      | 143 (60.3)  | 23 (9.7)    | 71 (30.0)    |         |
| 3                          |      | 572 (65.3)  | 89 (10.2)   | 215 (24.5)   |         |
| 4                          |      | 65 (67.1)   | 8 (8.3)     | 23 (24.0)    |         |
| Tobacco history, n (%)     | 1244 |             |             |              | 0.385   |
| Current                    |      | 264 (63.2)  | 39 (9.2)    | 117 (27.6)   |         |
| Never used                 |      | 83 (67.5)   | 16 (13.0)   | 24 (19.5)    |         |
| Prior use                  |      | 449 (64.4)  | 67 (9.6)    | 181 (26.0)   |         |
| Tumor size, M (SD)         | 1244 | 3.47 (2.23) | 4.11 (2.46) | 3.99 (2.45)  | <0.001  |
| Tumor.size , n (%)         | 1244 |             |             |              | <0.001  |
| <=3 cm                     |      | 436 (70.7)  | 50 (8.1)    | 131 (19.0)   |         |
| >3 cm but <=5 cm           |      | 222 (60.2)  | 36 (9.8)    | 111 (30.1)   |         |
| >5cm                       |      | 142 (55.0)  | 36 (14.0)   | 80 (31.50)   |         |
| Lobar Location, n (%)      | 1244 |             |             |              | 0.001   |
| Left lower lobe            |      | 107 (60.1)  | 30 (16.9)   | 41 (23.0)    |         |
| Left upper or lingula      |      | 223 (69.9)  | 31 (9.8)    | 65 (20.4)    |         |
| Right lower or middle lobe |      | 172 (59.5)  | 32 (11.1)   | 85 (29.4)    |         |
| Right upper lobe           |      | 298 (65.1)  | 29 (6.13)   | 131 (28.6)   |         |
| Tumor location, n (%)      | 1244 |             |             |              | <0.001  |
| Central 1/3rd              |      | 171 (52.3)  | 43 (13.2)   | 113 (34.6)   |         |
| Outer 2/3rd                |      | 629 (68.6)  | 79 (8.6)    | 209 (22.8)   |         |

|                                |      |            |           |            |        |
|--------------------------------|------|------------|-----------|------------|--------|
| Histology, n (%)               | 1244 |            |           |            | 0.220  |
| Adenocarcinoma                 |      | 404 (62.9) | 58 (9.0)  | 180 (28.0) |        |
| Other                          |      | 38 (74.5)  | 6 (11.8)  | 7 (13.7)   |        |
| Squamous                       |      | 273 (64.4) | 42 (9.9)  | 109 (25.7) |        |
| Poorly-differentiated NSCLC    |      | 85 (66.9)  | 16 (12.6) | 26 (20.5)  |        |
| Nodule in the same lobe, n (%) | 1244 |            |           |            | 0.005  |
| No                             |      | 693 (66.2) | 99 (9.5)  | 255 (24.4) |        |
| Yes                            |      | 107 (54.3) | 23 (11.7) | 67 (34.0)  |        |
| Nodule in the same lung, n (%) | 1244 |            |           |            | 0.002  |
| No                             |      | 751 (65.5) | 114 (9.9) | 282 (24.6) |        |
| Yes                            |      | 49 (50.5)  | 8 (8.3)   | 40 (41.2)  |        |
| N stage CT, n (%)              | 1244 |            |           |            | <0.001 |
| 0                              |      | 526 (88.1) | 29 (4.9)  | 42 (7.0)   |        |
| 1                              |      | 64 (46.4)  | 55 (39.9) | 19 (13.8)  |        |
| 2                              |      | 146 (42.9) | 29 (8.5)  | 163 (48.5) |        |
| 3                              |      | 64 (37.9)  | 9 (5.3)   | 96 (56.8)  |        |
| N stage PET, n (%)             | 1244 |            |           |            | <0.001 |
| 0                              |      | 512 (93.8) | 15 (2.8)  | 19 (3.5)   |        |
| 1                              |      | 101 (54.6) | 71 (38.4) | 13 (7.0)   |        |
| 2                              |      | 94 (29.3)  | 28 (8.7)  | 199 (62.0) |        |
| 3                              |      | 93 (48.4)  | 8 (4.2)   | 91 (47.4)  |        |
| N stage by PET-CT, n (%)       | 1244 |            |           |            | <0.001 |
| CT=N0 or N1, PET=N0            |      | 431 (94.3) | 14 (3.1)  | 12 (2.6)   |        |
| CT=N0 or N1, PET=N1            |      | 88 (55.4)  | 59 (37.1) | 12 (7.5)   |        |
| CT=N0 or N1, PET=N2 3          |      | 71 (59.7)  | 11 (9.2)  | 37(31.1)   |        |
| CT=N2 or N3, PET=N0            |      | 81 (91.0)  | 1 (1.1)   | 7(7.9)     |        |
| CT=N2 or N3, PET=N1            |      | 13 (50.0)  | 12 (46.2) | 1 (3.8)    |        |
| CT=N2 or N3, PET=N2 3          |      | 116 (29.4) | 25 (6.4)  | 253 (64.2) |        |
| M stage, n (%)                 | 1244 |            |           |            | 0.716  |
| M0                             |      | 728 (64.7) | 110 (9.8) | 288 (25.6) |        |
| Mx                             |      | 72 (61.0)  | 12 (10.2) | 34 (28.8)  |        |

*Definition of abbreviations:* NSCLC: non-small cell lung cancer; N2|3: N2 or N3

**e-Table 7. Comparison of HOMER with Institution Specific Calibrated HOMER Model at Three Institutions**

| Performance Measure                                           | Cleveland Clinic Foundation | Henry Ford Hospital | Johns Hopkins    |
|---------------------------------------------------------------|-----------------------------|---------------------|------------------|
| Brier Score                                                   |                             |                     |                  |
| HOMER                                                         | 0.286                       | 0.392               | 0.376            |
| Institution specific c-HOMER <sup>a</sup>                     | 0.290                       | 0.414               | 0.437            |
| Hosmer-Lemeshow p-value                                       |                             |                     |                  |
| HOMER                                                         | 0.02                        | 0.01                | 0.02             |
| Institution specific c-HOMER <sup>a</sup>                     | 0.01                        | 0.001               | <0.0001          |
| Observed vs. Forecast prN1 2 3 (vs. N0)                       |                             |                     |                  |
| Observed prN1 2 3                                             | 0.263                       | 0.389               | 0.363            |
| HOMER forecast prN1 2 3                                       | 0.290                       | 0.361               | 0.380            |
| Institution specific c-HOMER <sup>a</sup> forecast prN1 2 3   | 0.315                       | 0.515               | 0.524            |
| Observed vs. Predicted prN2 3 (vs. N0 1)                      |                             |                     |                  |
| Observed prN2 3                                               | 0.182                       | 0.269               | 0.285            |
| HOMER forecast prN2 3                                         | 0.218                       | 0.289               | 0.302            |
| Institution specific c-HOMER <sup>a</sup> forecast prN2 3     | 0.249                       | 0.412               | 0.421            |
| ROC-AUC <sup>b</sup> for predicting prN1 2 3 (vs. N0) disease |                             |                     |                  |
| HOMER                                                         |                             | 0.81 (0.73-0.90)    | 0.80 (0.74-0.87) |
| Institution specific c-HOMER <sup>a</sup>                     | 0.85(0.80-0.91)             | 0.81 (0.73-0.90)    | 0.80 (0.74-0.87) |
| ROC-AUC <sup>b</sup> for predicting prN2 3 (vs. N0 1) disease |                             |                     |                  |
| HOMER                                                         |                             | 0.85(0.77-0.92)     | 0.84 (0.78-0.90) |
| Institution specific c-HOMER <sup>a</sup>                     | 0.91 (0.88-0.95)            | 0.85(0.77-0.92)     | 0.84(0.78-0.90)  |

*Definitions of abbreviations:* probability of N1|2|3: N1 disease or higher; prN2|3: probability of N2 or N3 disease; ROC-AUC: Area Under the Receiver Operating Characteristic Curve; N0|1: N0 or N1

<sup>a</sup>c-HOMER: calibrated HOMER model, generated by using the general calibration method applied to a specific institution.

<sup>b</sup>Note that the ROC AUC is the same for HOMER and the c-HOMER models. The general calibration method used to generate the c-HOMER models does not impact model discrimination, it only changes calibration.

**e-Table 8. Association between Tumor Size and N2 or N3 Malignant Nodal Involvement by EBUS when PET-CT N stage is N0**

| Tumor size                          | N0 1 by EBUS<br>(n=565) | N2 3 by EBUS<br>(n=12) | Proportion of patients with N2 3 disease by EBUS, (95% CI) | Total | P-value <sup>a</sup> |
|-------------------------------------|-------------------------|------------------------|------------------------------------------------------------|-------|----------------------|
| Patients with tumors measuring ≤3cm | 369                     | 10                     | 0.026 (0.013-0.048)                                        | 379   | P=0.235              |
| Patients with tumors measuring >3cm | 196                     | 2                      | 0.010(0.001-0.036)                                         | 198   |                      |

*Definition of abbreviations:* N0|1: N0 or N1; N2|3: N2 or N3; CI: credible interval

<sup>a</sup>p-value for Fisher’s exact test.



**e-Table 9. Predicted Probabilities N2|3 Disease for a Given Change in the Explanatory Variables in the Development Cohort Using HAL**

| CT PET N stage      | Age | Histology | Location      | Predicted prN2 3 |
|---------------------|-----|-----------|---------------|------------------|
| CT=N0 or N1, PET=N0 | 40  | Adeno     | Central 1/3rd | 0.152            |
| CT=N0 or N1, PET=N0 | 40  | Adeno     | Outer 2/3rd   | 0.090            |
| CT=N0 or N1, PET=N0 | 40  | Squamous  | Central 1/3rd | 0.073            |
| CT=N0 or N1, PET=N0 | 40  | Squamous  | Outer 2/3rd   | 0.042            |
| CT=N0 or N1, PET=N0 | 40  | NSCLC     | Central 1/3rd | 0.171            |
| CT=N0 or N1, PET=N0 | 40  | NSCLC     | Outer 2/3rd   | 0.103            |
| CT=N0 or N1, PET=N0 | 40  | Other     | Central 1/3rd | 0.097            |
| CT=N0 or N1, PET=N0 | 40  | Other     | Outer 2/3rd   | 0.056            |
| CT=N0 or N1, PET=N0 | 50  | Adeno     | Central 1/3rd | 0.116            |
| CT=N0 or N1, PET=N0 | 50  | Adeno     | Outer 2/3rd   | 0.068            |
| CT=N0 or N1, PET=N0 | 50  | Squamous  | Central 1/3rd | 0.054            |
| CT=N0 or N1, PET=N0 | 50  | Squamous  | Outer 2/3rd   | 0.031            |
| CT=N0 or N1, PET=N0 | 50  | NSCLC     | Central 1/3rd | 0.131            |
| CT=N0 or N1, PET=N0 | 50  | NSCLC     | Outer 2/3rd   | 0.077            |
| CT=N0 or N1, PET=N0 | 50  | Other     | Central 1/3rd | 0.073            |
| CT=N0 or N1, PET=N0 | 50  | Other     | Outer 2/3rd   | 0.042            |
| CT=N0 or N1, PET=N0 | 60  | Adeno     | Central 1/3rd | 0.088            |
| CT=N0 or N1, PET=N0 | 60  | Adeno     | Outer 2/3rd   | 0.051            |
| CT=N0 or N1, PET=N0 | 60  | Squamous  | Central 1/3rd | 0.040            |
| CT=N0 or N1, PET=N0 | 60  | Squamous  | Outer 2/3rd   | 0.023            |
| CT=N0 or N1, PET=N0 | 60  | NSCLC     | Central 1/3rd | 0.100            |
| CT=N0 or N1, PET=N0 | 60  | NSCLC     | Outer 2/3rd   | 0.058            |
| CT=N0 or N1, PET=N0 | 60  | Other     | Central 1/3rd | 0.055            |
| CT=N0 or N1, PET=N0 | 60  | Other     | Outer 2/3rd   | 0.031            |
| CT=N0 or N1, PET=N0 | 70  | Adeno     | Central 1/3rd | 0.066            |
| CT=N0 or N1, PET=N0 | 70  | Adeno     | Outer 2/3rd   | 0.038            |
| CT=N0 or N1, PET=N0 | 70  | Squamous  | Central 1/3rd | 0.030            |



|                     |    |          |               |       |
|---------------------|----|----------|---------------|-------|
| CT=N0 or N1, PET=N0 | 70 | Squamous | Outer 2/3rd   | 0.017 |
| CT=N0 or N1, PET=N0 | 70 | NSCLC    | Central 1/3rd | 0.075 |
| CT=N0 or N1, PET=N0 | 70 | NSCLC    | Outer 2/3rd   | 0.043 |
| CT=N0 or N1, PET=N0 | 70 | Other    | Central 1/3rd | 0.041 |
| CT=N0 or N1, PET=N0 | 70 | Other    | Outer 2/3rd   | 0.023 |
| CT=N0 or N1, PET=N0 | 80 | Adeno    | Central 1/3rd | 0.049 |
| CT=N0 or N1, PET=N0 | 80 | Adeno    | Outer 2/3rd   | 0.028 |
| CT=N0 or N1, PET=N0 | 80 | Squamous | Central 1/3rd | 0.022 |
| CT=N0 or N1, PET=N0 | 80 | Squamous | Outer 2/3rd   | 0.012 |
| CT=N0 or N1, PET=N0 | 80 | NSCLC    | Central 1/3rd | 0.056 |
| CT=N0 or N1, PET=N0 | 80 | NSCLC    | Outer 2/3rd   | 0.032 |
| CT=N0 or N1, PET=N0 | 80 | Other    | Central 1/3rd | 0.030 |
| CT=N0 or N1, PET=N0 | 80 | Other    | Outer 2/3rd   | 0.017 |
| CT=N0 or N1, PET=N1 | 40 | Adeno    | Central 1/3rd | 0.464 |
| CT=N0 or N1, PET=N1 | 40 | Adeno    | Outer 2/3rd   | 0.324 |
| CT=N0 or N1, PET=N1 | 40 | Squamous | Central 1/3rd | 0.275 |
| CT=N0 or N1, PET=N1 | 40 | Squamous | Outer 2/3rd   | 0.174 |
| CT=N0 or N1, PET=N1 | 40 | NSCLC    | Central 1/3rd | 0.499 |
| CT=N0 or N1, PET=N1 | 40 | NSCLC    | Outer 2/3rd   | 0.356 |
| CT=N0 or N1, PET=N1 | 40 | Other    | Central 1/3rd | 0.342 |
| CT=N0 or N1, PET=N1 | 40 | Other    | Outer 2/3rd   | 0.224 |
| CT=N0 or N1, PET=N1 | 50 | Adeno    | Central 1/3rd | 0.388 |
| CT=N0 or N1, PET=N1 | 50 | Adeno    | Outer 2/3rd   | 0.260 |
| CT=N0 or N1, PET=N1 | 50 | Squamous | Central 1/3rd | 0.218 |
| CT=N0 or N1, PET=N1 | 50 | Squamous | Outer 2/3rd   | 0.134 |
| CT=N0 or N1, PET=N1 | 50 | NSCLC    | Central 1/3rd | 0.422 |
| CT=N0 or N1, PET=N1 | 50 | NSCLC    | Outer 2/3rd   | 0.289 |
| CT=N0 or N1, PET=N1 | 50 | Other    | Central 1/3rd | 0.276 |
| CT=N0 or N1, PET=N1 | 50 | Other    | Outer 2/3rd   | 0.175 |
| CT=N0 or N1, PET=N1 | 60 | Adeno    | Central 1/3rd | 0.317 |
| CT=N0 or N1, PET=N1 | 60 | Adeno    | Outer 2/3rd   | 0.205 |
| CT=N0 or N1, PET=N1 | 60 | Squamous | Central 1/3rd | 0.169 |



|                           |    |          |               |       |
|---------------------------|----|----------|---------------|-------|
| CT=N0 or N1, PET=N1       | 60 | Squamous | Outer 2/3rd   | 0.102 |
| CT=N0 or N1, PET=N1       | 60 | NSCLC    | Central 1/3rd | 0.349 |
| CT=N0 or N1, PET=N1       | 60 | NSCLC    | Outer 2/3rd   | 0.229 |
| CT=N0 or N1, PET=N1       | 60 | Other    | Central 1/3rd | 0.218 |
| CT=N0 or N1, PET=N1       | 60 | Other    | Outer 2/3rd   | 0.134 |
| CT=N0 or N1, PET=N1       | 70 | Adeno    | Central 1/3rd | 0.254 |
| CT=N0 or N1, PET=N1       | 70 | Adeno    | Outer 2/3rd   | 0.159 |
| CT=N0 or N1, PET=N1       | 70 | Squamous | Central 1/3rd | 0.130 |
| CT=N0 or N1, PET=N1       | 70 | Squamous | Outer 2/3rd   | 0.077 |
| CT=N0 or N1, PET=N1       | 70 | NSCLC    | Central 1/3rd | 0.282 |
| CT=N0 or N1, PET=N1       | 70 | NSCLC    | Outer 2/3rd   | 0.179 |
| CT=N0 or N1, PET=N1       | 70 | Other    | Central 1/3rd | 0.170 |
| CT=N0 or N1, PET=N1       | 70 | Other    | Outer 2/3rd   | 0.102 |
| CT=N0 or N1, PET=N1       | 80 | Adeno    | Central 1/3rd | 0.199 |
| CT=N0 or N1, PET=N1       | 80 | Adeno    | Outer 2/3rd   | 0.122 |
| CT=N0 or N1, PET=N1       | 80 | Squamous | Central 1/3rd | 0.099 |
| CT=N0 or N1, PET=N1       | 80 | Squamous | Outer 2/3rd   | 0.057 |
| CT=N0 or N1, PET=N1       | 80 | NSCLC    | Central 1/3rd | 0.223 |
| CT=N0 or N1, PET=N1       | 80 | NSCLC    | Outer 2/3rd   | 0.138 |
| CT=N0 or N1, PET=N1       | 80 | Other    | Central 1/3rd | 0.130 |
| CT=N0 or N1, PET=N1       | 80 | Other    | Outer 2/3rd   | 0.077 |
| CT=N0 or N1, PET=N2 or N3 | 40 | Adeno    | Central 1/3rd | 0.657 |
| CT=N0 or N1, PET=N2 or N3 | 40 | Adeno    | Outer 2/3rd   | 0.516 |
| CT=N0 or N1, PET=N2 or N3 | 40 | Squamous | Central 1/3rd | 0.457 |
| CT=N0 or N1, PET=N2 or N3 | 40 | Squamous | Outer 2/3rd   | 0.318 |
| CT=N0 or N1, PET=N2 or N3 | 40 | NSCLC    | Central 1/3rd | 0.688 |
| CT=N0 or N1, PET=N2 or N3 | 40 | NSCLC    | Outer 2/3rd   | 0.551 |
| CT=N0 or N1, PET=N2 or N3 | 40 | Other    | Central 1/3rd | 0.536 |
| CT=N0 or N1, PET=N2 or N3 | 40 | Other    | Outer 2/3rd   | 0.390 |
| CT=N0 or N1, PET=N2 or N3 | 50 | Adeno    | Central 1/3rd | 0.584 |
| CT=N0 or N1, PET=N2 or N3 | 50 | Adeno    | Outer 2/3rd   | 0.438 |
| CT=N0 or N1, PET=N2 or N3 | 50 | Squamous | Central 1/3rd | 0.381 |



|                           |    |          |               |       |
|---------------------------|----|----------|---------------|-------|
| CT=N0 or N1, PET=N2 or N3 | 50 | Squamous | Outer 2/3rd   | 0.255 |
| CT=N0 or N1, PET=N2 or N3 | 50 | NSCLC    | Central 1/3rd | 0.618 |
| CT=N0 or N1, PET=N2 or N3 | 50 | NSCLC    | Outer 2/3rd   | 0.473 |
| CT=N0 or N1, PET=N2 or N3 | 50 | Other    | Central 1/3rd | 0.458 |
| CT=N0 or N1, PET=N2 or N3 | 50 | Other    | Outer 2/3rd   | 0.319 |
| CT=N0 or N1, PET=N2 or N3 | 60 | Adeno    | Central 1/3rd | 0.507 |
| CT=N0 or N1, PET=N2 or N3 | 60 | Adeno    | Outer 2/3rd   | 0.364 |
| CT=N0 or N1, PET=N2 or N3 | 60 | Squamous | Central 1/3rd | 0.311 |
| CT=N0 or N1, PET=N2 or N3 | 60 | Squamous | Outer 2/3rd   | 0.200 |
| CT=N0 or N1, PET=N2 or N3 | 60 | NSCLC    | Central 1/3rd | 0.543 |
| CT=N0 or N1, PET=N2 or N3 | 60 | NSCLC    | Outer 2/3rd   | 0.397 |
| CT=N0 or N1, PET=N2 or N3 | 60 | Other    | Central 1/3rd | 0.382 |
| CT=N0 or N1, PET=N2 or N3 | 60 | Other    | Outer 2/3rd   | 0.256 |
| CT=N0 or N1, PET=N2 or N3 | 70 | Adeno    | Central 1/3rd | 0.430 |
| CT=N0 or N1, PET=N2 or N3 | 70 | Adeno    | Outer 2/3rd   | 0.295 |
| CT=N0 or N1, PET=N2 or N3 | 70 | Squamous | Central 1/3rd | 0.249 |
| CT=N0 or N1, PET=N2 or N3 | 70 | Squamous | Outer 2/3rd   | 0.155 |
| CT=N0 or N1, PET=N2 or N3 | 70 | NSCLC    | Central 1/3rd | 0.465 |
| CT=N0 or N1, PET=N2 or N3 | 70 | NSCLC    | Outer 2/3rd   | 0.326 |
| CT=N0 or N1, PET=N2 or N3 | 70 | Other    | Central 1/3rd | 0.312 |
| CT=N0 or N1, PET=N2 or N3 | 70 | Other    | Outer 2/3rd   | 0.201 |
| CT=N0 or N1, PET=N2 or N3 | 80 | Adeno    | Central 1/3rd | 0.356 |
| CT=N0 or N1, PET=N2 or N3 | 80 | Adeno    | Outer 2/3rd   | 0.235 |
| CT=N0 or N1, PET=N2 or N3 | 80 | Squamous | Central 1/3rd | 0.195 |
| CT=N0 or N1, PET=N2 or N3 | 80 | Squamous | Outer 2/3rd   | 0.119 |
| CT=N0 or N1, PET=N2 or N3 | 80 | NSCLC    | Central 1/3rd | 0.389 |
| CT=N0 or N1, PET=N2 or N3 | 80 | NSCLC    | Outer 2/3rd   | 0.261 |
| CT=N0 or N1, PET=N2 or N3 | 80 | Other    | Central 1/3rd | 0.249 |
| CT=N0 or N1, PET=N2 or N3 | 80 | Other    | Outer 2/3rd   | 0.156 |
| CT=N2 or N3, PET=N0       | 40 | Adeno    | Central 1/3rd | 0.320 |
| CT=N2 or N3, PET=N0       | 40 | Adeno    | Outer 2/3rd   | 0.207 |
| CT=N2 or N3, PET=N0       | 40 | Squamous | Central 1/3rd | 0.171 |



|                     |    |          |               |       |
|---------------------|----|----------|---------------|-------|
| CT=N2 or N3, PET=N0 | 40 | Squamous | Outer 2/3rd   | 0.103 |
| CT=N2 or N3, PET=N0 | 40 | NSCLC    | Central 1/3rd | 0.352 |
| CT=N2 or N3, PET=N0 | 40 | NSCLC    | Outer 2/3rd   | 0.232 |
| CT=N2 or N3, PET=N0 | 40 | Other    | Central 1/3rd | 0.221 |
| CT=N2 or N3, PET=N0 | 40 | Other    | Outer 2/3rd   | 0.136 |
| CT=N2 or N3, PET=N0 | 50 | Adeno    | Central 1/3rd | 0.257 |
| CT=N2 or N3, PET=N0 | 50 | Adeno    | Outer 2/3rd   | 0.161 |
| CT=N2 or N3, PET=N0 | 50 | Squamous | Central 1/3rd | 0.132 |
| CT=N2 or N3, PET=N0 | 50 | Squamous | Outer 2/3rd   | 0.078 |
| CT=N2 or N3, PET=N0 | 50 | NSCLC    | Central 1/3rd | 0.285 |
| CT=N2 or N3, PET=N0 | 50 | NSCLC    | Outer 2/3rd   | 0.181 |
| CT=N2 or N3, PET=N0 | 50 | Other    | Central 1/3rd | 0.172 |
| CT=N2 or N3, PET=N0 | 50 | Other    | Outer 2/3rd   | 0.103 |
| CT=N2 or N3, PET=N0 | 60 | Adeno    | Central 1/3rd | 0.202 |
| CT=N2 or N3, PET=N0 | 60 | Adeno    | Outer 2/3rd   | 0.123 |
| CT=N2 or N3, PET=N0 | 60 | Squamous | Central 1/3rd | 0.100 |
| CT=N2 or N3, PET=N0 | 60 | Squamous | Outer 2/3rd   | 0.058 |
| CT=N2 or N3, PET=N0 | 60 | NSCLC    | Central 1/3rd | 0.226 |
| CT=N2 or N3, PET=N0 | 60 | NSCLC    | Outer 2/3rd   | 0.139 |
| CT=N2 or N3, PET=N0 | 60 | Other    | Central 1/3rd | 0.132 |
| CT=N2 or N3, PET=N0 | 60 | Other    | Outer 2/3rd   | 0.078 |
| CT=N2 or N3, PET=N0 | 70 | Adeno    | Central 1/3rd | 0.156 |
| CT=N2 or N3, PET=N0 | 70 | Adeno    | Outer 2/3rd   | 0.093 |
| CT=N2 or N3, PET=N0 | 70 | Squamous | Central 1/3rd | 0.075 |
| CT=N2 or N3, PET=N0 | 70 | Squamous | Outer 2/3rd   | 0.043 |
| CT=N2 or N3, PET=N0 | 70 | NSCLC    | Central 1/3rd | 0.176 |
| CT=N2 or N3, PET=N0 | 70 | NSCLC    | Outer 2/3rd   | 0.106 |
| CT=N2 or N3, PET=N0 | 70 | Other    | Central 1/3rd | 0.100 |
| CT=N2 or N3, PET=N0 | 70 | Other    | Outer 2/3rd   | 0.058 |
| CT=N2 or N3, PET=N0 | 80 | Adeno    | Central 1/3rd | 0.120 |
| CT=N2 or N3, PET=N0 | 80 | Adeno    | Outer 2/3rd   | 0.070 |
| CT=N2 or N3, PET=N0 | 80 | Squamous | Central 1/3rd | 0.056 |



|                     |    |          |               |       |
|---------------------|----|----------|---------------|-------|
| CT=N2 or N3, PET=N0 | 80 | Squamous | Outer 2/3rd   | 0.032 |
| CT=N2 or N3, PET=N0 | 80 | NSCLC    | Central 1/3rd | 0.135 |
| CT=N2 or N3, PET=N0 | 80 | NSCLC    | Outer 2/3rd   | 0.080 |
| CT=N2 or N3, PET=N0 | 80 | Other    | Central 1/3rd | 0.076 |
| CT=N2 or N3, PET=N0 | 80 | Other    | Outer 2/3rd   | 0.043 |
| CT=N2 or N3, PET=N1 | 40 | Adeno    | Central 1/3rd | 0.305 |
| CT=N2 or N3, PET=N1 | 40 | Adeno    | Outer 2/3rd   | 0.196 |
| CT=N2 or N3, PET=N1 | 40 | Squamous | Central 1/3rd | 0.162 |
| CT=N2 or N3, PET=N1 | 40 | Squamous | Outer 2/3rd   | 0.097 |
| CT=N2 or N3, PET=N1 | 40 | NSCLC    | Central 1/3rd | 0.336 |
| CT=N2 or N3, PET=N1 | 40 | NSCLC    | Outer 2/3rd   | 0.220 |
| CT=N2 or N3, PET=N1 | 40 | Other    | Central 1/3rd | 0.209 |
| CT=N2 or N3, PET=N1 | 40 | Other    | Outer 2/3rd   | 0.128 |
| CT=N2 or N3, PET=N1 | 50 | Adeno    | Central 1/3rd | 0.244 |
| CT=N2 or N3, PET=N1 | 50 | Adeno    | Outer 2/3rd   | 0.152 |
| CT=N2 or N3, PET=N1 | 50 | Squamous | Central 1/3rd | 0.124 |
| CT=N2 or N3, PET=N1 | 50 | Squamous | Outer 2/3rd   | 0.073 |
| CT=N2 or N3, PET=N1 | 50 | NSCLC    | Central 1/3rd | 0.271 |
| CT=N2 or N3, PET=N1 | 50 | NSCLC    | Outer 2/3rd   | 0.171 |
| CT=N2 or N3, PET=N1 | 50 | Other    | Central 1/3rd | 0.162 |
| CT=N2 or N3, PET=N1 | 50 | Other    | Outer 2/3rd   | 0.097 |
| CT=N2 or N3, PET=N1 | 60 | Adeno    | Central 1/3rd | 0.191 |
| CT=N2 or N3, PET=N1 | 60 | Adeno    | Outer 2/3rd   | 0.116 |
| CT=N2 or N3, PET=N1 | 60 | Squamous | Central 1/3rd | 0.094 |
| CT=N2 or N3, PET=N1 | 60 | Squamous | Outer 2/3rd   | 0.054 |
| CT=N2 or N3, PET=N1 | 60 | NSCLC    | Central 1/3rd | 0.214 |
| CT=N2 or N3, PET=N1 | 60 | NSCLC    | Outer 2/3rd   | 0.131 |
| CT=N2 or N3, PET=N1 | 60 | Other    | Central 1/3rd | 0.124 |
| CT=N2 or N3, PET=N1 | 60 | Other    | Outer 2/3rd   | 0.073 |
| CT=N2 or N3, PET=N1 | 70 | Adeno    | Central 1/3rd | 0.148 |
| CT=N2 or N3, PET=N1 | 70 | Adeno    | Outer 2/3rd   | 0.088 |
| CT=N2 or N3, PET=N1 | 70 | Squamous | Central 1/3rd | 0.071 |



|                           |    |          |               |       |
|---------------------------|----|----------|---------------|-------|
| CT=N2 or N3, PET=N1       | 70 | Squamous | Outer 2/3rd   | 0.040 |
| CT=N2 or N3, PET=N1       | 70 | NSCLC    | Central 1/3rd | 0.166 |
| CT=N2 or N3, PET=N1       | 70 | NSCLC    | Outer 2/3rd   | 0.100 |
| CT=N2 or N3, PET=N1       | 70 | Other    | Central 1/3rd | 0.094 |
| CT=N2 or N3, PET=N1       | 70 | Other    | Outer 2/3rd   | 0.055 |
| CT=N2 or N3, PET=N1       | 80 | Adeno    | Central 1/3rd | 0.113 |
| CT=N2 or N3, PET=N1       | 80 | Adeno    | Outer 2/3rd   | 0.066 |
| CT=N2 or N3, PET=N1       | 80 | Squamous | Central 1/3rd | 0.053 |
| CT=N2 or N3, PET=N1       | 80 | Squamous | Outer 2/3rd   | 0.030 |
| CT=N2 or N3, PET=N1       | 80 | NSCLC    | Central 1/3rd | 0.128 |
| CT=N2 or N3, PET=N1       | 80 | NSCLC    | Outer 2/3rd   | 0.075 |
| CT=N2 or N3, PET=N1       | 80 | Other    | Central 1/3rd | 0.071 |
| CT=N2 or N3, PET=N1       | 80 | Other    | Outer 2/3rd   | 0.041 |
| CT=N2 or N3, PET=N2 or N3 | 40 | Adeno    | Central 1/3rd | 0.884 |
| CT=N2 or N3, PET=N2 or N3 | 40 | Adeno    | Outer 2/3rd   | 0.809 |
| CT=N2 or N3, PET=N2 or N3 | 40 | Squamous | Central 1/3rd | 0.770 |
| CT=N2 or N3, PET=N2 or N3 | 40 | Squamous | Outer 2/3rd   | 0.650 |
| CT=N2 or N3, PET=N2 or N3 | 40 | NSCLC    | Central 1/3rd | 0.898 |
| CT=N2 or N3, PET=N2 or N3 | 40 | NSCLC    | Outer 2/3rd   | 0.830 |
| CT=N2 or N3, PET=N2 or N3 | 40 | Other    | Central 1/3rd | 0.821 |
| CT=N2 or N3, PET=N2 or N3 | 40 | Other    | Outer 2/3rd   | 0.718 |
| CT=N2 or N3, PET=N2 or N3 | 50 | Adeno    | Central 1/3rd | 0.848 |
| CT=N2 or N3, PET=N2 or N3 | 50 | Adeno    | Outer 2/3rd   | 0.756 |
| CT=N2 or N3, PET=N2 or N3 | 50 | Squamous | Central 1/3rd | 0.710 |
| CT=N2 or N3, PET=N2 or N3 | 50 | Squamous | Outer 2/3rd   | 0.576 |
| CT=N2 or N3, PET=N2 or N3 | 50 | NSCLC    | Central 1/3rd | 0.866 |
| CT=N2 or N3, PET=N2 or N3 | 50 | NSCLC    | Outer 2/3rd   | 0.781 |
| CT=N2 or N3, PET=N2 or N3 | 50 | Other    | Central 1/3rd | 0.771 |
| CT=N2 or N3, PET=N2 or N3 | 50 | Other    | Outer 2/3rd   | 0.651 |
| CT=N2 or N3, PET=N2 or N3 | 60 | Adeno    | Central 1/3rd | 0.804 |
| CT=N2 or N3, PET=N2 or N3 | 60 | Adeno    | Outer 2/3rd   | 0.694 |
| CT=N2 or N3, PET=N2 or N3 | 60 | Squamous | Central 1/3rd | 0.642 |



|                           |    |          |               |       |
|---------------------------|----|----------|---------------|-------|
| CT=N2 or N3, PET=N2 or N3 | 60 | Squamous | Outer 2/3rd   | 0.499 |
| CT=N2 or N3, PET=N2 or N3 | 60 | NSCLC    | Central 1/3rd | 0.825 |
| CT=N2 or N3, PET=N2 or N3 | 60 | NSCLC    | Outer 2/3rd   | 0.724 |
| CT=N2 or N3, PET=N2 or N3 | 60 | Other    | Central 1/3rd | 0.711 |
| CT=N2 or N3, PET=N2 or N3 | 60 | Other    | Outer 2/3rd   | 0.578 |
| CT=N2 or N3, PET=N2 or N3 | 70 | Adeno    | Central 1/3rd | 0.750 |
| CT=N2 or N3, PET=N2 or N3 | 70 | Adeno    | Outer 2/3rd   | 0.625 |
| CT=N2 or N3, PET=N2 or N3 | 70 | Squamous | Central 1/3rd | 0.568 |
| CT=N2 or N3, PET=N2 or N3 | 70 | Squamous | Outer 2/3rd   | 0.422 |
| CT=N2 or N3, PET=N2 or N3 | 70 | NSCLC    | Central 1/3rd | 0.776 |
| CT=N2 or N3, PET=N2 or N3 | 70 | NSCLC    | Outer 2/3rd   | 0.657 |
| CT=N2 or N3, PET=N2 or N3 | 70 | Other    | Central 1/3rd | 0.643 |
| CT=N2 or N3, PET=N2 or N3 | 70 | Other    | Outer 2/3rd   | 0.500 |
| CT=N2 or N3, PET=N2 or N3 | 80 | Adeno    | Central 1/3rd | 0.687 |
| CT=N2 or N3, PET=N2 or N3 | 80 | Adeno    | Outer 2/3rd   | 0.550 |
| CT=N2 or N3, PET=N2 or N3 | 80 | Squamous | Central 1/3rd | 0.491 |
| CT=N2 or N3, PET=N2 or N3 | 80 | Squamous | Outer 2/3rd   | 0.349 |
| CT=N2 or N3, PET=N2 or N3 | 80 | NSCLC    | Central 1/3rd | 0.717 |
| CT=N2 or N3, PET=N2 or N3 | 80 | NSCLC    | Outer 2/3rd   | 0.584 |
| CT=N2 or N3, PET=N2 or N3 | 80 | Other    | Central 1/3rd | 0.569 |
| CT=N2 or N3, PET=N2 or N3 | 80 | Other    | Outer 2/3rd   | 0.423 |

*Definition of variables:* NSCLC: non-small cell lung cancer; prN2|3: probability of N2 or N3 disease

To find the scenario you are interested in, recognize that the scenarios are organized based 1<sup>st</sup> on the CT N stage, then by the PET N stage, then by age, cancer type, and finally by tumor location. Probabilities are based on the development cohort.



**e-Table 10. Predicted Probabilities of N0, N1 and N2|3 Disease for a Given Change in the Explanatory Variables in the Development Cohort Using HOMER**

| PET-CT              | Histology          | Location      | Age | Predicted probability of N0 | Predicted Probability of N1 | Predicted Probability of N2 3 |
|---------------------|--------------------|---------------|-----|-----------------------------|-----------------------------|-------------------------------|
| CT=N0 or N1, PET=N0 | Adenocarcinoma     | Central 1/3rd | 60  | 0.896                       | 0.022                       | 0.081                         |
| CT=N0 or N1, PET=N0 | Adenocarcinoma     | Outer 2/3rd   | 60  | 0.934                       | 0.015                       | 0.052                         |
| CT=N0 or N1, PET=N0 | Squamous cell      | Central 1/3rd | 60  | 0.952                       | 0.011                       | 0.037                         |
| CT=N0 or N1, PET=N0 | Squamous cell      | Outer 2/3rd   | 60  | 0.970                       | 0.007                       | 0.023                         |
| CT=N0 or N1, PET=N0 | Non-small cell     | Central 1/3rd | 60  | 0.890                       | 0.024                       | 0.086                         |
| CT=N0 or N1, PET=N0 | Non-small cell     | Outer 2/3rd   | 60  | 0.930                       | 0.016                       | 0.055                         |
| CT=N0 or N1, PET=N0 | Other lung primary | Central 1/3rd | 60  | 0.929                       | 0.016                       | 0.055                         |
| CT=N0 or N1, PET=N0 | Other lung primary | Outer 2/3rd   | 60  | 0.955                       | 0.010                       | 0.035                         |
| CT=N0 or N1, PET=N0 | Adenocarcinoma     | Central 1/3rd | 70  | 0.921                       | 0.017                       | 0.062                         |
| CT=N0 or N1, PET=N0 | Adenocarcinoma     | Outer 2/3rd   | 70  | 0.950                       | 0.011                       | 0.039                         |
| CT=N0 or N1, PET=N0 | Squamous cell      | Central 1/3rd | 70  | 0.963                       | 0.008                       | 0.028                         |
| CT=N0 or N1, PET=N0 | Squamous cell      | Outer 2/3rd   | 70  | 0.977                       | 0.005                       | 0.018                         |
| CT=N0 or N1, PET=N0 | Non-small cell     | Central 1/3rd | 70  | 0.916                       | 0.018                       | 0.066                         |
| CT=N0 or N1, PET=N0 | Non-small cell     | Outer 2/3rd   | 70  | 0.947                       | 0.012                       | 0.041                         |
| CT=N0 or N1, PET=N0 | Other lung primary | Central 1/3rd | 70  | 0.946                       | 0.012                       | 0.042                         |
| CT=N0 or N1, PET=N0 | Other lung primary | Outer 2/3rd   | 70  | 0.966                       | 0.008                       | 0.026                         |
| CT=N0 or N1, PET=N0 | Adenocarcinoma     | Central 1/3rd | 80  | 0.940                       | 0.014                       | 0.047                         |



|                     |                    |               |    |       |       |       |
|---------------------|--------------------|---------------|----|-------|-------|-------|
| CT=N0 or N1, PET=N0 | Adenocarcinoma     | Outer 2/3rd   | 80 | 0.962 | 0.009 | 0.029 |
| CT=N0 or N1, PET=N0 | Squamous cell      | Central 1/3rd | 80 | 0.972 | 0.006 | 0.021 |
| CT=N0 or N1, PET=N0 | Squamous cell      | Outer 2/3rd   | 80 | 0.983 | 0.004 | 0.013 |
| CT=N0 or N1, PET=N0 | Non-small cell     | Central 1/3rd | 80 | 0.936 | 0.014 | 0.050 |
| CT=N0 or N1, PET=N0 | Non-small cell     | Outer 2/3rd   | 80 | 0.960 | 0.009 | 0.031 |
| CT=N0 or N1, PET=N0 | Other lung primary | Central 1/3rd | 80 | 0.959 | 0.009 | 0.032 |
| CT=N0 or N1, PET=N0 | Other lung primary | Outer 2/3rd   | 80 | 0.974 | 0.006 | 0.020 |
| CT=N0 or N1, PET=N1 | Adenocarcinoma     | Central 1/3rd | 60 | 0.284 | 0.413 | 0.303 |
| CT=N0 or N1, PET=N1 | Adenocarcinoma     | Outer 2/3rd   | 60 | 0.392 | 0.397 | 0.211 |
| CT=N0 or N1, PET=N1 | Squamous cell      | Central 1/3rd | 60 | 0.474 | 0.365 | 0.161 |
| CT=N0 or N1, PET=N1 | Squamous cell      | Outer 2/3rd   | 60 | 0.595 | 0.300 | 0.105 |
| CT=N0 or N1, PET=N1 | Non-small cell     | Central 1/3rd | 60 | 0.271 | 0.412 | 0.317 |
| CT=N0 or N1, PET=N1 | Non-small cell     | Outer 2/3rd   | 60 | 0.377 | 0.401 | 0.222 |
| CT=N0 or N1, PET=N1 | Other lung primary | Central 1/3rd | 60 | 0.374 | 0.402 | 0.224 |
| CT=N0 or N1, PET=N1 | Other lung primary | Outer 2/3rd   | 60 | 0.493 | 0.356 | 0.151 |
| CT=N0 or N1, PET=N1 | Adenocarcinoma     | Central 1/3rd | 70 | 0.347 | 0.408 | 0.245 |
| CT=N0 or N1, PET=N1 | Adenocarcinoma     | Outer 2/3rd   | 70 | 0.464 | 0.370 | 0.166 |
| CT=N0 or N1, PET=N1 | Squamous cell      | Central 1/3rd | 70 | 0.547 | 0.328 | 0.125 |
| CT=N0 or N1, PET=N1 | Squamous cell      | Outer 2/3rd   | 70 | 0.663 | 0.257 | 0.081 |
| CT=N0 or N1, PET=N1 | Non-small cell     | Central 1/3rd | 70 | 0.333 | 0.410 | 0.257 |
| CT=N0 or N1, PET=N1 | Non-small cell     | Outer 2/3rd   | 70 | 0.448 | 0.377 | 0.175 |
| CT=N0 or N1, PET=N1 | Other lung primary | Central 1/3rd | 70 | 0.445 | 0.378 | 0.177 |

*Online supplements are not copyedited prior to posting and the author(s) take full responsibility for the accuracy of all data.*



|                           |                    |               |    |       |       |       |
|---------------------------|--------------------|---------------|----|-------|-------|-------|
| CT=N0 or N1, PET=N1       | Other lung primary | Outer 2/3rd   | 70 | 0.566 | 0.317 | 0.117 |
| CT=N0 or N1, PET=N1       | Adenocarcinoma     | Central 1/3rd | 80 | 0.416 | 0.389 | 0.195 |
| CT=N0 or N1, PET=N1       | Adenocarcinoma     | Outer 2/3rd   | 80 | 0.537 | 0.334 | 0.130 |
| CT=N0 or N1, PET=N1       | Squamous cell      | Central 1/3rd | 80 | 0.618 | 0.286 | 0.096 |
| CT=N0 or N1, PET=N1       | Squamous cell      | Outer 2/3rd   | 80 | 0.725 | 0.214 | 0.062 |
| CT=N0 or N1, PET=N1       | Non-small cell     | Central 1/3rd | 80 | 0.401 | 0.394 | 0.205 |
| CT=N0 or N1, PET=N1       | Non-small cell     | Outer 2/3rd   | 80 | 0.521 | 0.342 | 0.137 |
| CT=N0 or N1, PET=N1       | Other lung primary | Central 1/3rd | 80 | 0.517 | 0.344 | 0.139 |
| CT=N0 or N1, PET=N1       | Other lung primary | Outer 2/3rd   | 80 | 0.636 | 0.274 | 0.090 |
| CT=N0 or N1, PET=N2 or N3 | Adenocarcinoma     | Central 1/3rd | 60 | 0.475 | 0.042 | 0.483 |
| CT=N0 or N1, PET=N2 or N3 | Adenocarcinoma     | Outer 2/3rd   | 60 | 0.595 | 0.040 | 0.365 |
| CT=N0 or N1, PET=N2 or N3 | Squamous cell      | Central 1/3rd | 60 | 0.673 | 0.036 | 0.292 |
| CT=N0 or N1, PET=N2 or N3 | Squamous cell      | Outer 2/3rd   | 60 | 0.770 | 0.028 | 0.202 |
| CT=N0 or N1, PET=N2 or N3 | Non-small cell     | Central 1/3rd | 60 | 0.459 | 0.042 | 0.499 |
| CT=N0 or N1, PET=N2 or N3 | Non-small cell     | Outer 2/3rd   | 60 | 0.580 | 0.040 | 0.380 |
| CT=N0 or N1, PET=N2 or N3 | Other lung primary | Central 1/3rd | 60 | 0.577 | 0.040 | 0.383 |
| CT=N0 or N1, PET=N2 or N3 | Other lung primary | Outer 2/3rd   | 60 | 0.689 | 0.035 | 0.276 |
| CT=N0 or N1, PET=N2 or N3 | Adenocarcinoma     | Central 1/3rd | 70 | 0.548 | 0.041 | 0.411 |
| CT=N0 or N1, PET=N2 or N3 | Adenocarcinoma     | Outer 2/3rd   | 70 | 0.663 | 0.036 | 0.301 |
| CT=N0 or N1, PET=N2 or N3 | Squamous cell      | Central 1/3rd | 70 | 0.734 | 0.031 | 0.235 |
| CT=N0 or N1, PET=N2 or N3 | Squamous cell      | Outer 2/3rd   | 70 | 0.817 | 0.024 | 0.159 |
| CT=N0 or N1, PET=N2 or N3 | Non-small cell     | Central 1/3rd | 70 | 0.532 | 0.041 | 0.427 |

*Online supplements are not copyedited prior to posting and the author(s) take full responsibility for the accuracy of all data.*



|                           |                    |               |    |       |       |       |
|---------------------------|--------------------|---------------|----|-------|-------|-------|
| CT=N0 or N1, PET=N2 or N3 | Non-small cell     | Outer 2/3rd   | 70 | 0.649 | 0.037 | 0.314 |
| CT=N0 or N1, PET=N2 or N3 | Other lung primary | Central 1/3rd | 70 | 0.646 | 0.037 | 0.317 |
| CT=N0 or N1, PET=N2 or N3 | Other lung primary | Outer 2/3rd   | 70 | 0.748 | 0.030 | 0.222 |
| CT=N0 or N1, PET=N2 or N3 | Adenocarcinoma     | Central 1/3rd | 80 | 0.619 | 0.039 | 0.343 |
| CT=N0 or N1, PET=N2 or N3 | Adenocarcinoma     | Outer 2/3rd   | 80 | 0.725 | 0.032 | 0.243 |
| CT=N0 or N1, PET=N2 or N3 | Squamous cell      | Central 1/3rd | 80 | 0.787 | 0.027 | 0.187 |
| CT=N0 or N1, PET=N2 or N3 | Squamous cell      | Outer 2/3rd   | 80 | 0.857 | 0.019 | 0.124 |
| CT=N0 or N1, PET=N2 or N3 | Non-small cell     | Central 1/3rd | 80 | 0.604 | 0.039 | 0.357 |
| CT=N0 or N1, PET=N2 or N3 | Non-small cell     | Outer 2/3rd   | 80 | 0.712 | 0.033 | 0.255 |
| CT=N0 or N1, PET=N2 or N3 | Other lung primary | Central 1/3rd | 80 | 0.710 | 0.033 | 0.257 |
| CT=N0 or N1, PET=N2 or N3 | Other lung primary | Outer 2/3rd   | 80 | 0.799 | 0.026 | 0.176 |
| CT=N2 or N3, PET=N0       | Adenocarcinoma     | Central 1/3rd | 60 | 0.728 | 0.081 | 0.191 |
| CT=N2 or N3, PET=N0       | Adenocarcinoma     | Outer 2/3rd   | 60 | 0.813 | 0.060 | 0.126 |
| CT=N2 or N3, PET=N0       | Squamous cell      | Central 1/3rd | 60 | 0.859 | 0.047 | 0.094 |
| CT=N2 or N3, PET=N0       | Squamous cell      | Outer 2/3rd   | 60 | 0.908 | 0.032 | 0.060 |
| CT=N2 or N3, PET=N0       | Non-small cell     | Central 1/3rd | 60 | 0.715 | 0.084 | 0.201 |
| CT=N2 or N3, PET=N0       | Non-small cell     | Outer 2/3rd   | 60 | 0.803 | 0.063 | 0.134 |
| CT=N2 or N3, PET=N0       | Other lung primary | Central 1/3rd | 60 | 0.801 | 0.064 | 0.135 |
| CT=N2 or N3, PET=N0       | Other lung primary | Outer 2/3rd   | 60 | 0.868 | 0.045 | 0.088 |
| CT=N2 or N3, PET=N0       | Adenocarcinoma     | Central 1/3rd | 70 | 0.782 | 0.069 | 0.149 |
| CT=N2 or N3, PET=N0       | Adenocarcinoma     | Outer 2/3rd   | 70 | 0.854 | 0.049 | 0.098 |
| CT=N2 or N3, PET=N0       | Squamous cell      | Central 1/3rd | 70 | 0.891 | 0.037 | 0.072 |

*Online supplements are not copyedited prior to posting and the author(s) take full responsibility for the accuracy of all data.*



|                     |                    |               |    |       |       |       |
|---------------------|--------------------|---------------|----|-------|-------|-------|
| CT=N2 or N3, PET=N0 | Squamous cell      | Outer 2/3rd   | 70 | 0.930 | 0.025 | 0.045 |
| CT=N2 or N3, PET=N0 | Non-small cell     | Central 1/3rd | 70 | 0.771 | 0.071 | 0.158 |
| CT=N2 or N3, PET=N0 | Non-small cell     | Outer 2/3rd   | 70 | 0.846 | 0.051 | 0.103 |
| CT=N2 or N3, PET=N0 | Other lung primary | Central 1/3rd | 70 | 0.844 | 0.052 | 0.104 |
| CT=N2 or N3, PET=N0 | Other lung primary | Outer 2/3rd   | 70 | 0.898 | 0.035 | 0.067 |
| CT=N2 or N3, PET=N0 | Adenocarcinoma     | Central 1/3rd | 80 | 0.828 | 0.056 | 0.116 |
| CT=N2 or N3, PET=N0 | Adenocarcinoma     | Outer 2/3rd   | 80 | 0.887 | 0.039 | 0.075 |
| CT=N2 or N3, PET=N0 | Squamous cell      | Central 1/3rd | 80 | 0.916 | 0.029 | 0.055 |
| CT=N2 or N3, PET=N0 | Squamous cell      | Outer 2/3rd   | 80 | 0.947 | 0.019 | 0.034 |
| CT=N2 or N3, PET=N0 | Non-small cell     | Central 1/3rd | 80 | 0.818 | 0.059 | 0.123 |
| CT=N2 or N3, PET=N0 | Non-small cell     | Outer 2/3rd   | 80 | 0.880 | 0.041 | 0.079 |
| CT=N2 or N3, PET=N0 | Other lung primary | Central 1/3rd | 80 | 0.879 | 0.041 | 0.080 |
| CT=N2 or N3, PET=N0 | Other lung primary | Outer 2/3rd   | 80 | 0.922 | 0.027 | 0.051 |
| CT=N2 or N3, PET=N1 | Adenocarcinoma     | Central 1/3rd | 60 | 0.303 | 0.513 | 0.183 |
| CT=N2 or N3, PET=N1 | Adenocarcinoma     | Outer 2/3rd   | 60 | 0.414 | 0.464 | 0.121 |
| CT=N2 or N3, PET=N1 | Squamous cell      | Central 1/3rd | 60 | 0.497 | 0.413 | 0.090 |
| CT=N2 or N3, PET=N1 | Squamous cell      | Outer 2/3rd   | 60 | 0.617 | 0.326 | 0.057 |
| CT=N2 or N3, PET=N1 | Non-small cell     | Central 1/3rd | 60 | 0.290 | 0.517 | 0.193 |
| CT=N2 or N3, PET=N1 | Non-small cell     | Outer 2/3rd   | 60 | 0.399 | 0.473 | 0.128 |
| CT=N2 or N3, PET=N1 | Other lung primary | Central 1/3rd | 60 | 0.396 | 0.474 | 0.130 |
| CT=N2 or N3, PET=N1 | Other lung primary | Outer 2/3rd   | 60 | 0.516 | 0.400 | 0.084 |
| CT=N2 or N3, PET=N1 | Adenocarcinoma     | Central 1/3rd | 70 | 0.368 | 0.488 | 0.144 |

*Online supplements are not copyedited prior to posting and the author(s) take full responsibility for the accuracy of all data.*



|                           |                    |               |    |       |       |       |
|---------------------------|--------------------|---------------|----|-------|-------|-------|
| CT=N2 or N3, PET=N1       | Adenocarcinoma     | Outer 2/3rd   | 70 | 0.487 | 0.420 | 0.093 |
| CT=N2 or N3, PET=N1       | Squamous cell      | Central 1/3rd | 70 | 0.570 | 0.361 | 0.069 |
| CT=N2 or N3, PET=N1       | Squamous cell      | Outer 2/3rd   | 70 | 0.683 | 0.273 | 0.043 |
| CT=N2 or N3, PET=N1       | Non-small cell     | Central 1/3rd | 70 | 0.354 | 0.495 | 0.152 |
| CT=N2 or N3, PET=N1       | Non-small cell     | Outer 2/3rd   | 70 | 0.471 | 0.430 | 0.099 |
| CT=N2 or N3, PET=N1       | Other lung primary | Central 1/3rd | 70 | 0.468 | 0.432 | 0.100 |
| CT=N2 or N3, PET=N1       | Other lung primary | Outer 2/3rd   | 70 | 0.588 | 0.348 | 0.064 |
| CT=N2 or N3, PET=N1       | Adenocarcinoma     | Central 1/3rd | 80 | 0.439 | 0.450 | 0.111 |
| CT=N2 or N3, PET=N1       | Adenocarcinoma     | Outer 2/3rd   | 80 | 0.560 | 0.369 | 0.071 |
| CT=N2 or N3, PET=N1       | Squamous cell      | Central 1/3rd | 80 | 0.640 | 0.308 | 0.052 |
| CT=N2 or N3, PET=N1       | Squamous cell      | Outer 2/3rd   | 80 | 0.743 | 0.224 | 0.033 |
| CT=N2 or N3, PET=N1       | Non-small cell     | Central 1/3rd | 80 | 0.423 | 0.459 | 0.118 |
| CT=N2 or N3, PET=N1       | Non-small cell     | Outer 2/3rd   | 80 | 0.544 | 0.380 | 0.076 |
| CT=N2 or N3, PET=N1       | Other lung primary | Central 1/3rd | 80 | 0.541 | 0.383 | 0.077 |
| CT=N2 or N3, PET=N1       | Other lung primary | Outer 2/3rd   | 80 | 0.657 | 0.295 | 0.049 |
| CT=N2 or N3, PET=N2 or N3 | Adenocarcinoma     | Central 1/3rd | 60 | 0.175 | 0.036 | 0.790 |
| CT=N2 or N3, PET=N2 or N3 | Adenocarcinoma     | Outer 2/3rd   | 60 | 0.256 | 0.046 | 0.698 |
| CT=N2 or N3, PET=N2 or N3 | Squamous cell      | Central 1/3rd | 60 | 0.325 | 0.052 | 0.623 |
| CT=N2 or N3, PET=N2 or N3 | Squamous cell      | Outer 2/3rd   | 60 | 0.439 | 0.057 | 0.504 |
| CT=N2 or N3, PET=N2 or N3 | Non-small cell     | Central 1/3rd | 60 | 0.166 | 0.034 | 0.800 |
| CT=N2 or N3, PET=N2 or N3 | Non-small cell     | Outer 2/3rd   | 60 | 0.244 | 0.045 | 0.711 |
| CT=N2 or N3, PET=N2 or N3 | Other lung primary | Central 1/3rd | 60 | 0.242 | 0.045 | 0.714 |

*Online supplements are not copyedited prior to posting and the author(s) take full responsibility for the accuracy of all data.*



|                           |                    |               |    |       |       |       |
|---------------------------|--------------------|---------------|----|-------|-------|-------|
| CT=N2 or N3, PET=N2 or N3 | Other lung primary | Outer 2/3rd   | 60 | 0.341 | 0.054 | 0.605 |
| CT=N2 or N3, PET=N2 or N3 | Adenocarcinoma     | Central 1/3rd | 70 | 0.221 | 0.042 | 0.737 |
| CT=N2 or N3, PET=N2 or N3 | Adenocarcinoma     | Outer 2/3rd   | 70 | 0.316 | 0.052 | 0.633 |
| CT=N2 or N3, PET=N2 or N3 | Squamous cell      | Central 1/3rd | 70 | 0.392 | 0.056 | 0.552 |
| CT=N2 or N3, PET=N2 or N3 | Squamous cell      | Outer 2/3rd   | 70 | 0.512 | 0.057 | 0.431 |
| CT=N2 or N3, PET=N2 or N3 | Non-small cell     | Central 1/3rd | 70 | 0.210 | 0.041 | 0.749 |
| CT=N2 or N3, PET=N2 or N3 | Non-small cell     | Outer 2/3rd   | 70 | 0.302 | 0.051 | 0.647 |
| CT=N2 or N3, PET=N2 or N3 | Other lung primary | Central 1/3rd | 70 | 0.299 | 0.050 | 0.650 |
| CT=N2 or N3, PET=N2 or N3 | Other lung primary | Outer 2/3rd   | 70 | 0.410 | 0.057 | 0.533 |
| CT=N2 or N3, PET=N2 or N3 | Adenocarcinoma     | Central 1/3rd | 80 | 0.275 | 0.048 | 0.676 |
| CT=N2 or N3, PET=N2 or N3 | Adenocarcinoma     | Outer 2/3rd   | 80 | 0.382 | 0.056 | 0.563 |
| CT=N2 or N3, PET=N2 or N3 | Squamous cell      | Central 1/3rd | 80 | 0.463 | 0.058 | 0.479 |
| CT=N2 or N3, PET=N2 or N3 | Squamous cell      | Outer 2/3rd   | 80 | 0.584 | 0.055 | 0.361 |
| CT=N2 or N3, PET=N2 or N3 | Non-small cell     | Central 1/3rd | 80 | 0.263 | 0.047 | 0.690 |
| CT=N2 or N3, PET=N2 or N3 | Non-small cell     | Outer 2/3rd   | 80 | 0.367 | 0.055 | 0.578 |
| CT=N2 or N3, PET=N2 or N3 | Other lung primary | Central 1/3rd | 80 | 0.364 | 0.055 | 0.581 |
| CT=N2 or N3, PET=N2 or N3 | Other lung primary | Outer 2/3rd   | 80 | 0.482 | 0.057 | 0.460 |

CT= computed tomography; PET= positron emission tomography; N2|3= N2 or N3 disease

To find the scenario you are interested in, recognize that the scenarios are organized based 1<sup>st</sup> on the CT N stage, then by the PET N stage, then by age, cancer type, and finally by tumor location. Probabilities are based on the development cohort.

**e-Figure 1.** Central tumors were defined as tumors located within the inner one-third of the hemi-thorax or if any part of the tumor is within the segmental airways on CT (shown in red). Peripheral tumors were defined as tumors located in the outer two-thirds of the hemi-thorax, with the tumor not touching the segmental airways and located outside the central one-third of the hemi-thorax on CT (shown in yellow).<sup>5</sup>

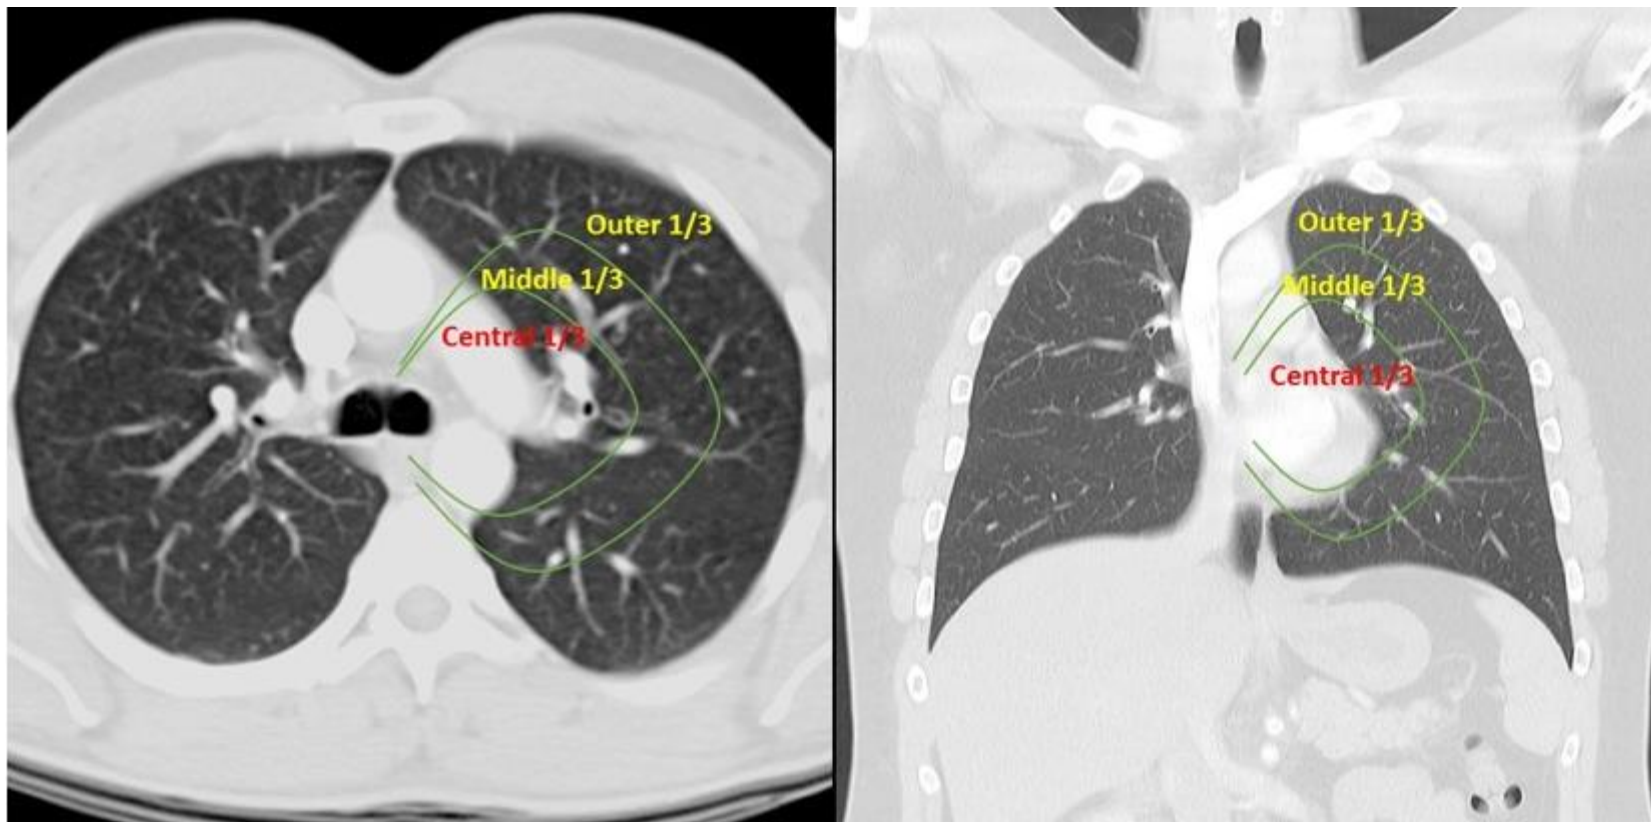

204905
